# Supplementary material for: Race/ethnicity-stratified fine-mapping of the MHC locus reveals genetic variants associated with late-onset asthma
Source: PubMed Central journal article supplement (PMC10321602; doi:10.3389/fgene.2023.1173676), 2023-06-21
Supplement: DataSheet1.pdf [file DataSheet1.pdf]

## *Supplementary Material*

# **Race/Ethnicity-Stratified Fine-Mapping of the MHC Locus Reveals Genetic Variants Associated with Late-Onset Asthma**

**Eunice Y. Lee, Wonson Choi, Adam B. Burkholder, Lalith Perera, Jasmine A. Mack, Frederick W. Miller, Michael B. Fessler, Donald N. Cook, Peer W. F. Karmaus, Hideki Nakano, Stavros Garantziotis, Jennifer H. Madenspacher, John, S. House, Farida S. Akhtari, Charles S. Schmitt, David C. Fargo, Janet E. Hall, Alison A. Motsinger-Reif<sup>†\*</sup>**

\* **Correspondence:** Alison A. Motsinger-Reif: [alison.motsinger-reif@nih.gov](mailto:alison.motsinger-reif@nih.gov)

## **1 Supplementary data**

### **1.1 Study participants: PEGS**

The Personalized Environmental and Genetics Study (PEGS) (N=19,672) collects questionnaire-based data on both endogenous and exogenous exposures to investigate the relationships between the exposome, genomics, and human health. Beginning in 2002, study participants were recruited through healthcare clinics, university campuses, health fairs, and volunteer study drives at businesses, community centers, and events in North Carolina. At enrollment, participants provide details of their medical, surgical, and health history, including current and past diseases and medical conditions. A description of the PEGS study design and the questionnaires administered to participants can be found at <https://joinastudy.niehs.nih.gov/studies/pegs>.

### **1.2 Whole-genome sequencing data generation, processing, and quality control**

Whole-genome sequencing (WGS) was performed by the Broad Institute on the NovaSeq 6000 platform to a minimum of 30X mean genome coverage. Details on whole-genome sequencing, variant calling, library construction, read processing, and sequence data quality control are described elsewhere (Akhtari et al., 2023). GATK 3.5.0 HaplotypeCaller, GATK 4.1.4.0 GenotypeGvcfs, and GATK 4.1.1.0 VariantFiltration were used to obtain variant calls, joint genotypes, and filtered flags, respectively. Variant calls were aligned to the GRCh38 reference genome using BWA-MEM (Li and Durbin, 2010). Variants with a heterozygosity phred score of  $\leq 54.69$  and VSQLOD score greater than 99.0% of true positive indels and 99.7% of true single nucleotide polymorphisms (SNPs) were assigned a 'PASS'. In this study, we excluded indels and focused on biallelic SNPs. We used PLINK 2.0 (Purcell et al., 2007) to conduct data quality control for the variants falling within the boundary of Chr6:28,510,120-33,480,577. We filtered out SNPs with a call rate less than 95%, minor allele frequency less than 1%, and those that failed the Hardy-Weinberg test at a 0.0001 significance-level threshold. For quality control of study participants, we excluded individuals with genotypes with more than 5% missing and pairs of individuals who were genetically related to the equivalent of second cousin (PLINK flags --genome --min 0.025). After quality control of WGS data, 40,535 SNPs remained.

### **1.3 Local genetic ancestry estimates**

We used SHAPEIT 4.2.1 to perform haplotype phasing across 29,062,806 variants for the subgroup of PEGS participants with whole-genome sequencing data ( $n = 4,737$ ), considering only variants that were genotyped in both the reference panel and PEGS. We estimated genome-wide local ancestry on the autosomes and X chromosome using RFMix, a discriminative modeling approach (Maples et al., 2013). The reference population was 2,504 unrelated individuals from the 1000 Genomes Project, Phase 3, with sequencing to a targeted depth of 30X (Byrska-Bishop et al., 2022). Based on the 1000 Genomes data, we classified genomic positions by five continental super populations: AFR (African), AMR (Admixed American), EAS (East Asian), EUR (European), and SAS (South Asian). Granular population groupings can be found in the International Genome Sample Resource (IGSR) (Fairley et al., 2020). We classified individuals as one of the five continental ancestral groups if any genome-wide local ancestral proportion was greater than 0.50.

#### 1.4 MHC region-wide allelic association tests

After quality control of sequencing data for the major histocompatibility complex (MHC) region, 41,012, 39,867, and 47,433 SNPs remained for pooled, EUR, and AFR ancestry, respectively. To correct for multiple hypothesis testing, we adopted a similar approach as previous studies (Lee et al., 2020). We used the *coda* package in R to determine the effective number of tests by fitting an autoregression model to the summary statistics. The effective number of tests is often smaller than the empirical number of tests since it accounts for the local genetic correlation between SNPs (linkage disequilibrium) used in association tests.

#### 1.5 Fine-mapping: conditional analysis

Using WGS data for PEGS participants, we conducted fine-mapping in the MHC region at 6p22.1-21.3 (chr6:28,510,120-33,480,577, assembly of GRCh38.p14) to identify candidate causal variants for late-onset asthma. From the results of the allelic association tests, we rank-ordered SNPs by their strength of association (p-values). We performed stepwise regression by adding one SNP at a time until the effect of the lead signal (i.e., the SNP with the smallest p-value from the allelic association tests) reached  $p > 0.05$ . During regression modeling, we considered the local linkage disequilibrium structure by filtering out SNPs based on their pairwise correlation ( $r^2 > 0.8$ ). The final model included independent SNPs associated with late-onset asthma adjusted for other SNPs and covariates.

#### 1.6 Functional annotation of genetic variants

For annotation, we used public data from ENCODE (ENCODE Project Consortium, 2012; Luo et al., 2020), HUGin (Martin et al., 2017), GTEx (Genotype-Tissue Expression (GTEx) Project, 2022), RegulomeDB (Boyle et al., 2012), Open Target Genetics (Ghoussaini et al., 2021; Mountjoy et al., 2021) to delineate the potential biological links between genetic variants and late-onset asthma in PEGS participants. We used quantitative measures of functional importance (CADD score and RegDB rank and score), DNase I hypersensitive site sequencing, histone modification ChIP-seq (H3K4me3, H3K27ac), transcription factor binding ChIP-seq (CTCF), long-range chromatin interactions (Hi-C), and expression quantitative trait loci (eQTL) data to investigate each SNP's potential genomic regulatory/functional role. Based on functional annotation, we prioritized SNPs with higher scores and supportive evidence as candidate causal variants contributing to late-onset asthma association signals.

#### 1.7 Assembly of HLA alleles: Kourami

Kourami is a recently developed enrichment-free computational method that uses WGS data to directly assemble full sequences of the peptide-binding domain (exons 2 and 3 for class I human leukocyte antigen (HLA) genes and exon 2 for class II HLA genes) (Lee and Kingsford, 2018). We first built a reference panel using multiple sequence alignments of known HLA alleles from the Immuno Polymorphism Database-International ImMunoGeneTics (IPD-IMGT)/HLA project database (Robinson et al., 2020). Based on the reference panel, we constructed an initial directed acyclic HLA graph, which we further modified by alignment projection (deletion or mismatch, insertion into a gap column, or insertion into a new column). Using this modified HLA graph, we identified the best paths with the maximum weights (number of reads) and most supportive phasing information to assemble pairs of candidate HLA alleles. We filtered the assembled HLA alleles to exclude ambiguous calls where two or more haplotypes were considered equally likely as well as calls supported by a “MaxFlow” parameter less than 10 and those with less than 95% identity with the called haplotype sequence.

### **1.8 Amino acid position inference: CookHLA and HATK**

The CookHLA and HLA analysis toolkit (HATK) enrichment-free computational HLA imputation/inference methods are data-based matching techniques that align WGS reads to known alleles. We used 1000 Genomes Project reference panels (SNPs in the MHC region and HLA types). For pooled ancestry (i.e., all study participants) (n=2,504), we used the ALL reference panel. For European and African ancestries, we used the EUR and AFR reference panels, respectively. We first inferred four-digit classical HLA alleles (*HLA-A*, *-B*, *-C*, *-DQB*, and *-DRB1*) with CookHLA. CookHLA uses the latest hidden Markov model, which incorporates genetic distance as an input. CookHLA also captures local genetic information through repeated imputation for each exon in HLA genes by embedding a marker set in the middle position of an exon and adaptively learning the genetic map of the MHC region. In this way, CookHLA accounts for variability in highly polymorphic exons and data- or population-specific linkage disequilibrium (LD) structure in the MHC region. The best-matched HLA alleles are generated as binary markers (presence/absence) based on consensus posterior probabilities from the repeated imputation.

We then applied HATK using the HLA allele information generated from CookHLA (the HLA PED equivalent to a plink PED file) to infer residues at each amino acid position. We built a dictionary for amino acid and DNA sequences for HLA genes based on the IMGT/HLA database and cleaned the [HLA allele names according to the nomenclature defined by the World Health Organization](#) amino acid positions as binary markers (presence/absence) and then conducted logistic regression using this dosage data, adjusting for the same covariates as for pooled, EUR, and AFR ancestries.

## 2 Supplementary Figures and Tables

### 2.1 Supplementary Figures

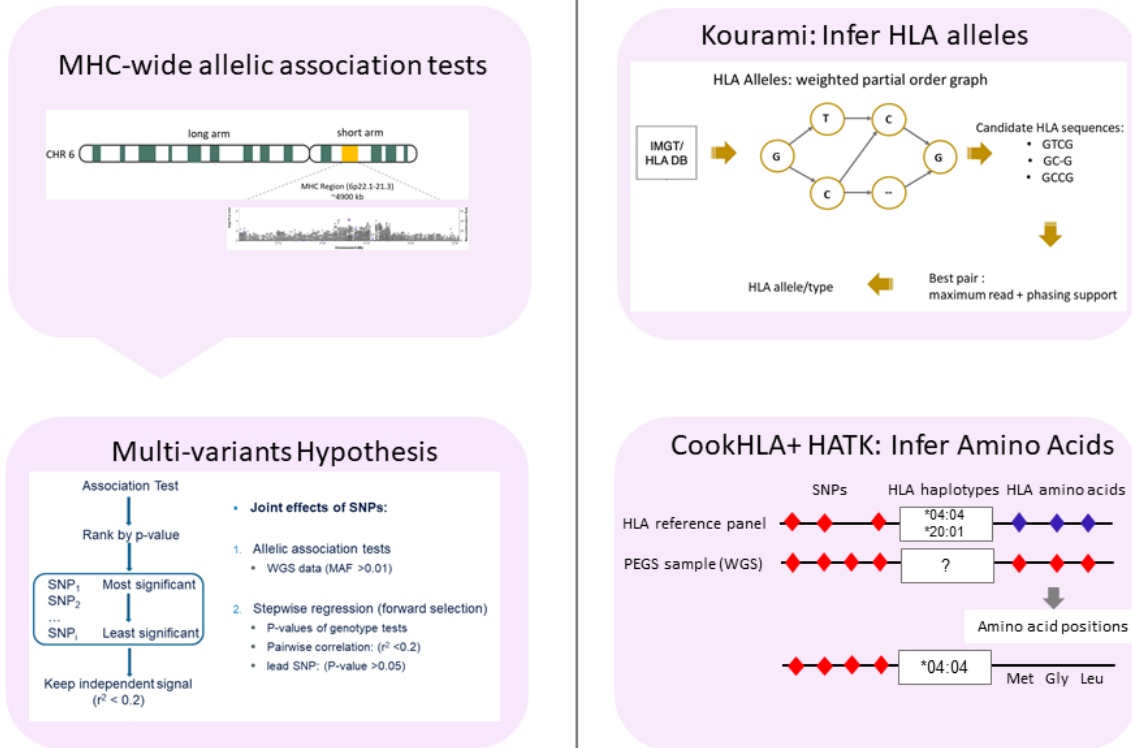

**Supplementary Figure S1.** Overview of the study analyses/methodologies.

(a)

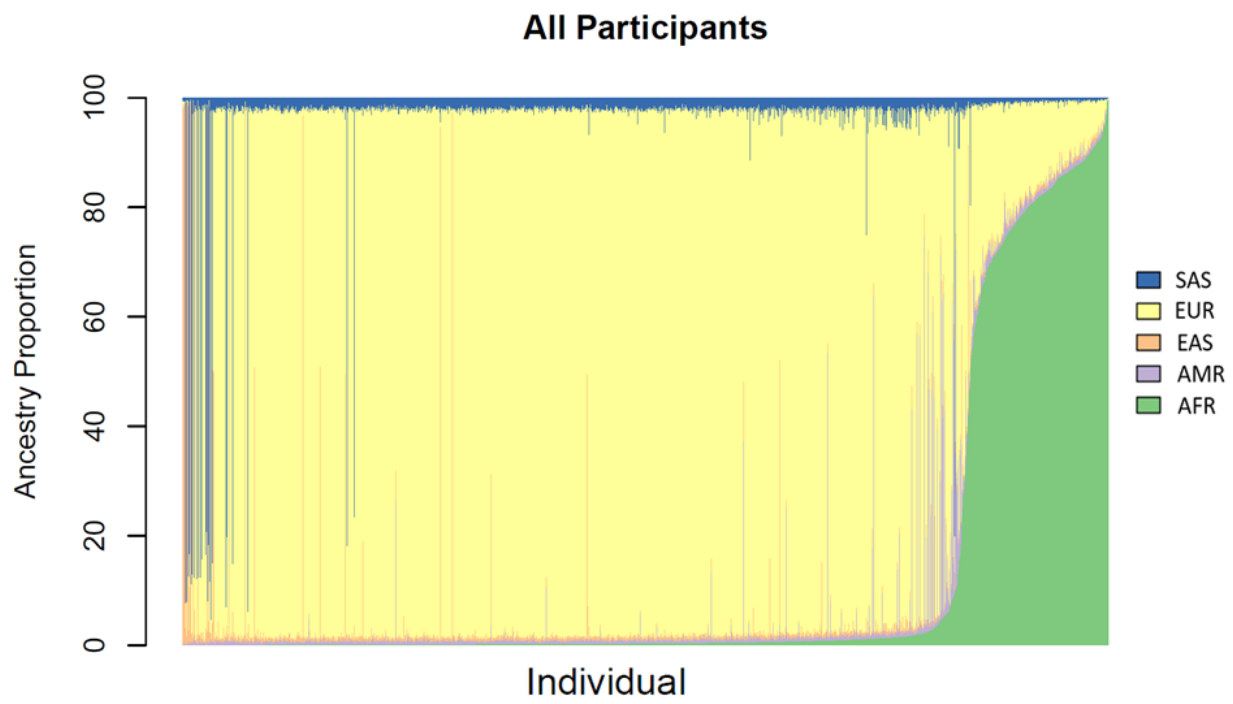

(b)

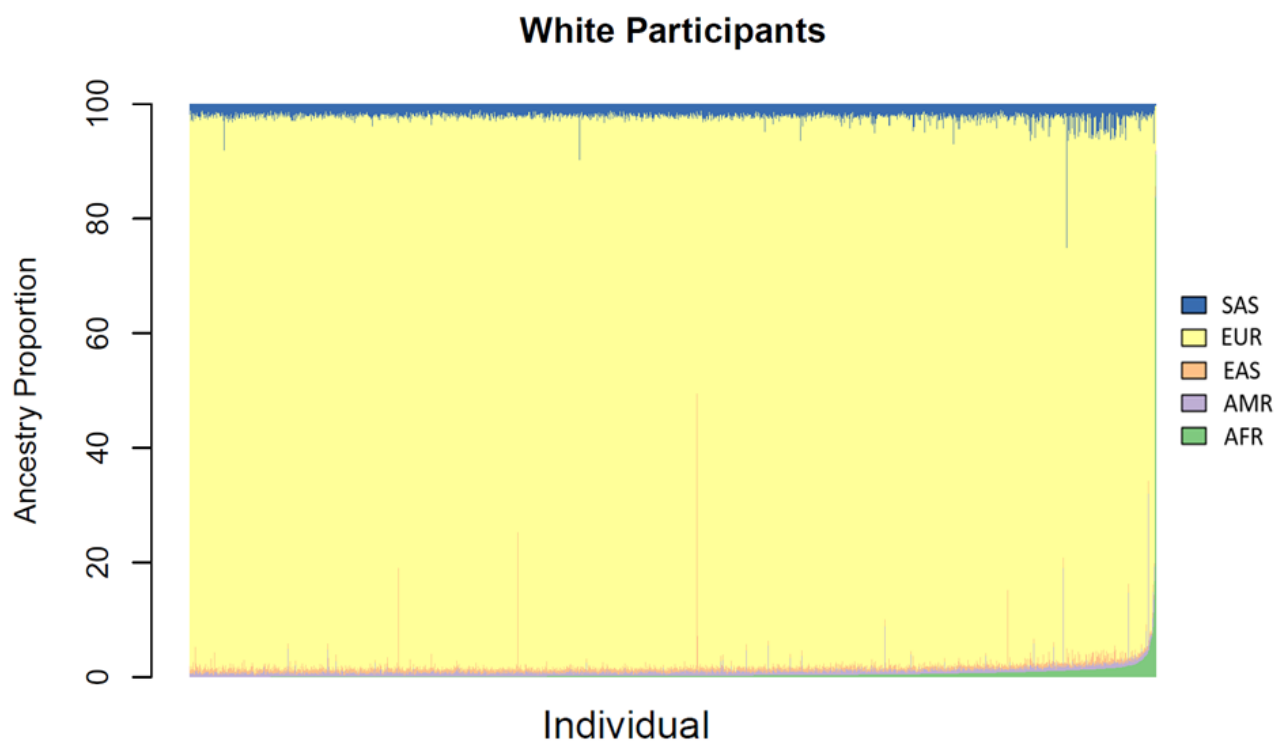

(c)

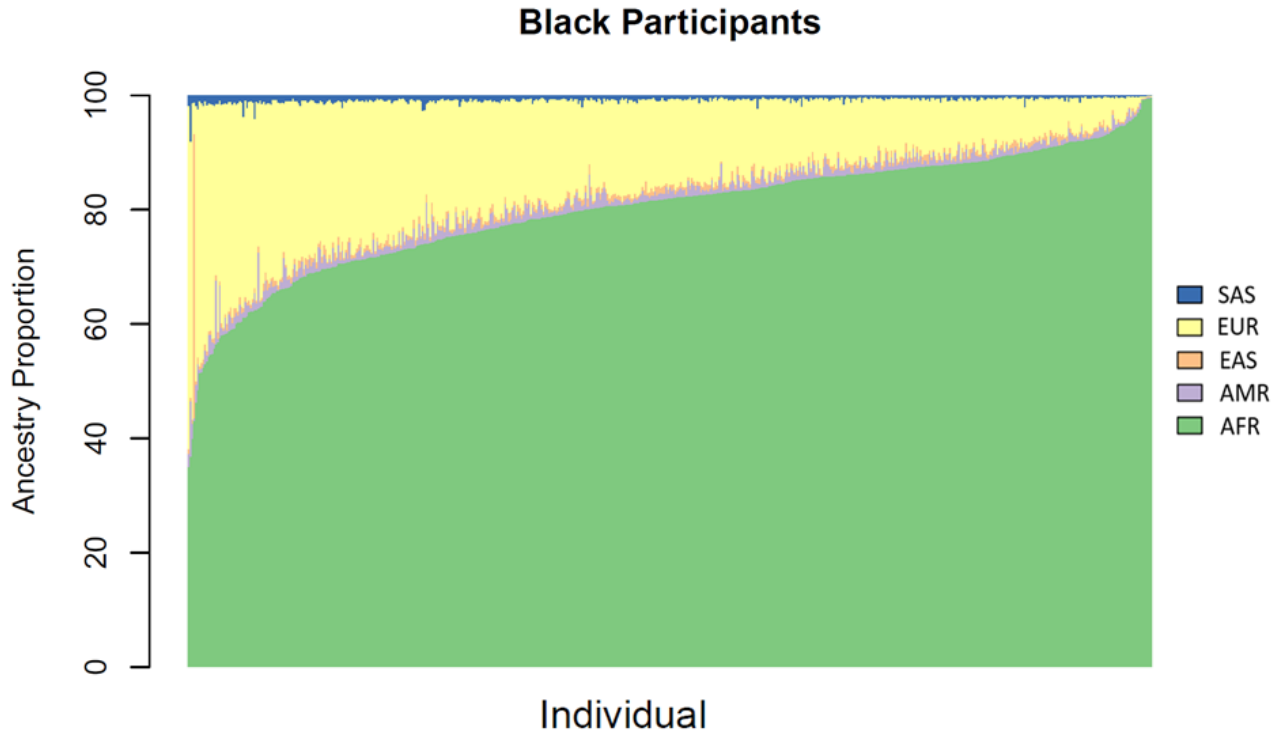

(d)

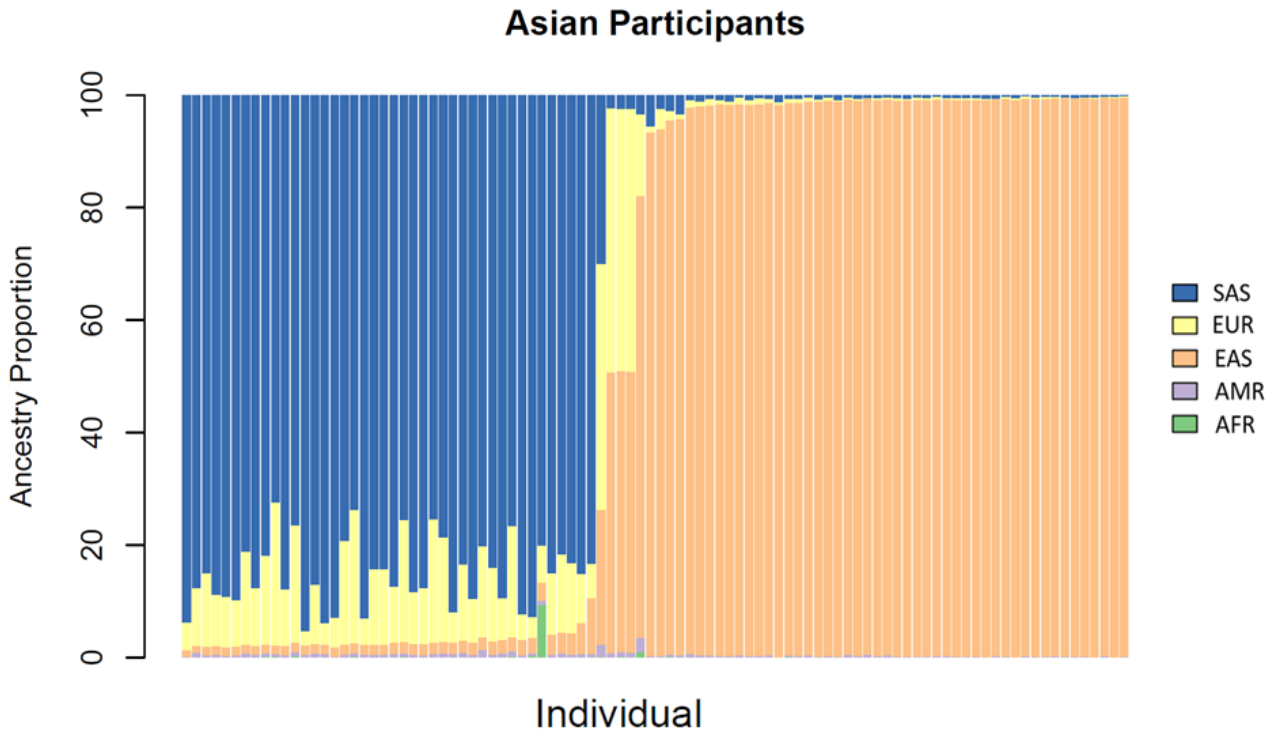

(e)

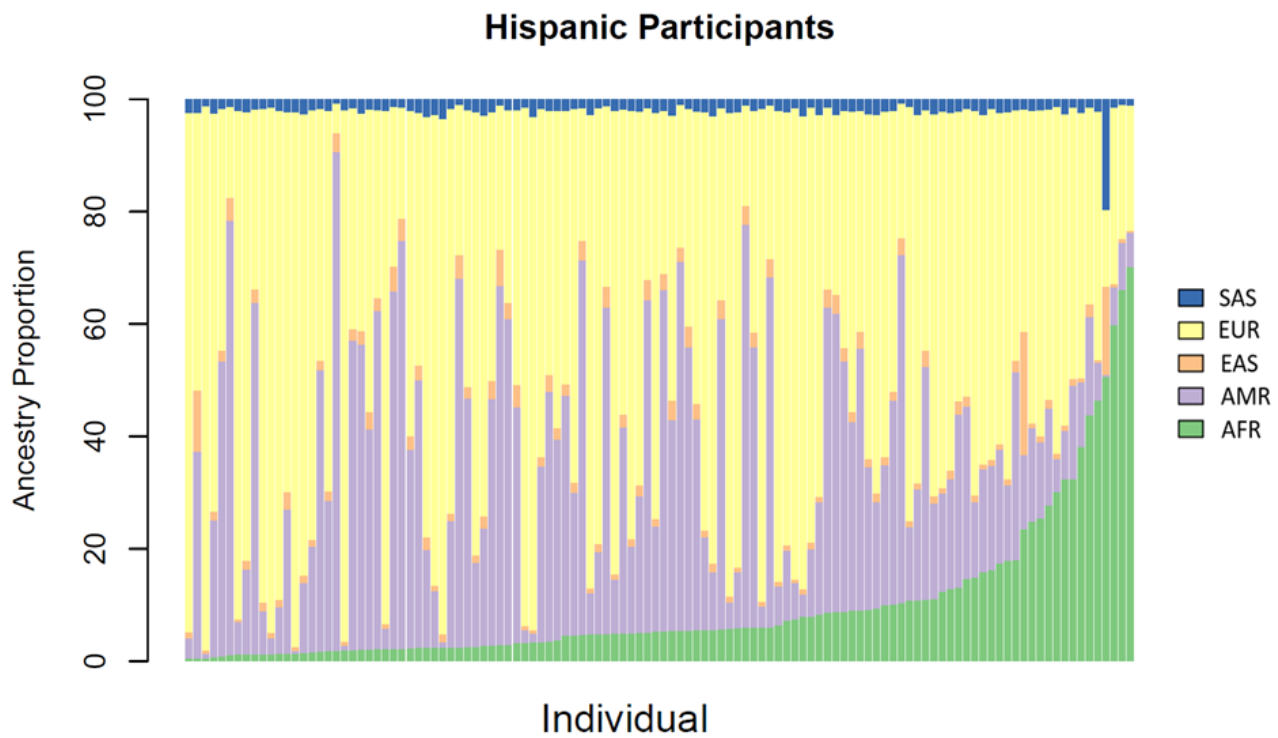

(f)

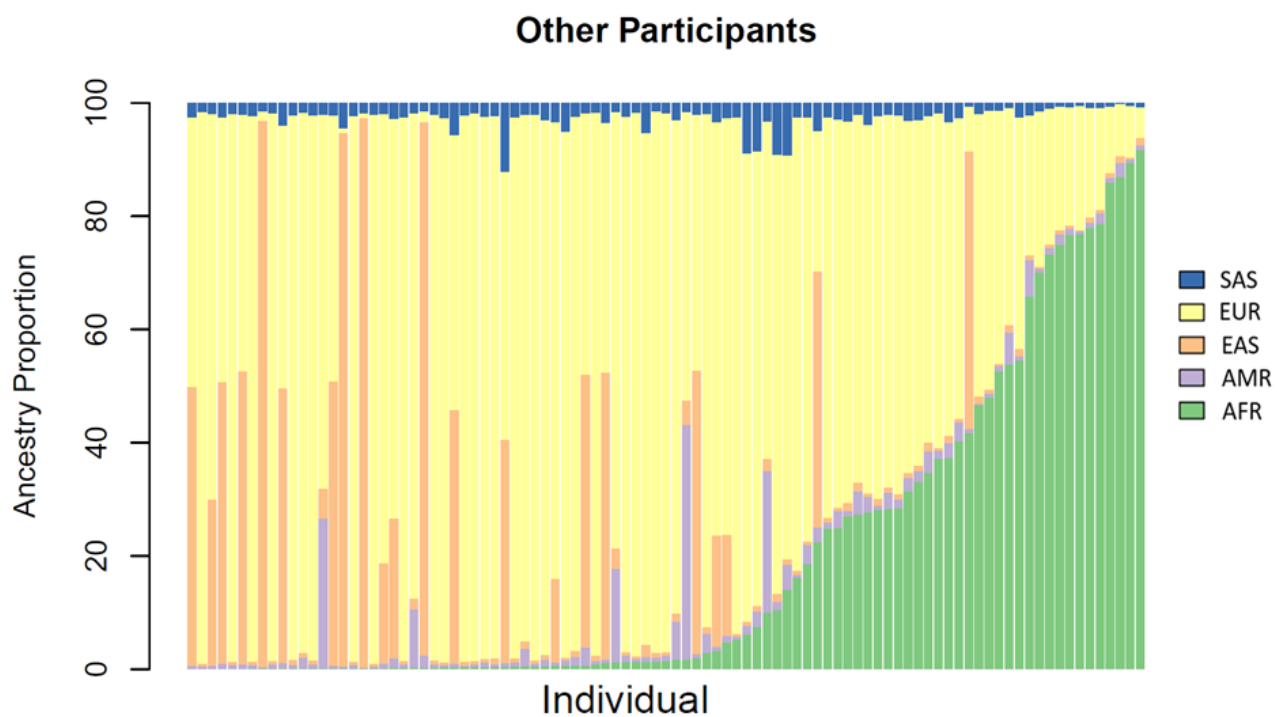

**Supplementary Figure S2.** Genome-wide ancestry proportions for five super populations for PEGS participants: African (AFR), Admixed American (AMR), East Asian (EAS), European (EUR), and Southeast Asian (SAS). Each bar on the X-axis represents an individual participant. The Y-axis shows the variability of the five ancestry proportions for a given individual. The figures show the ancestry proportions for (a) all participants, (b) participants self-identifying as White, (c) participants self-identifying as Black, (d) participants self-identifying as Asian, (e) participants self-identifying as Hispanic, and (f) participants self-identifying as other races/ethnicities.



### All Participants (n=3,641)

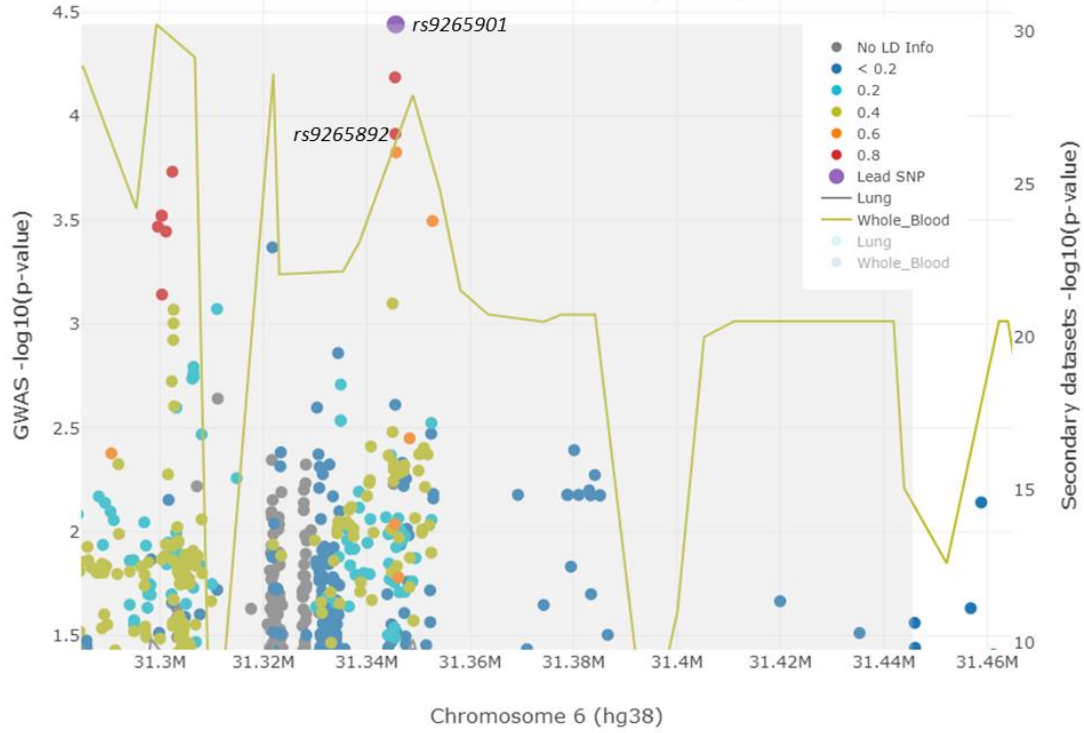

### White Participants (n=2,803)

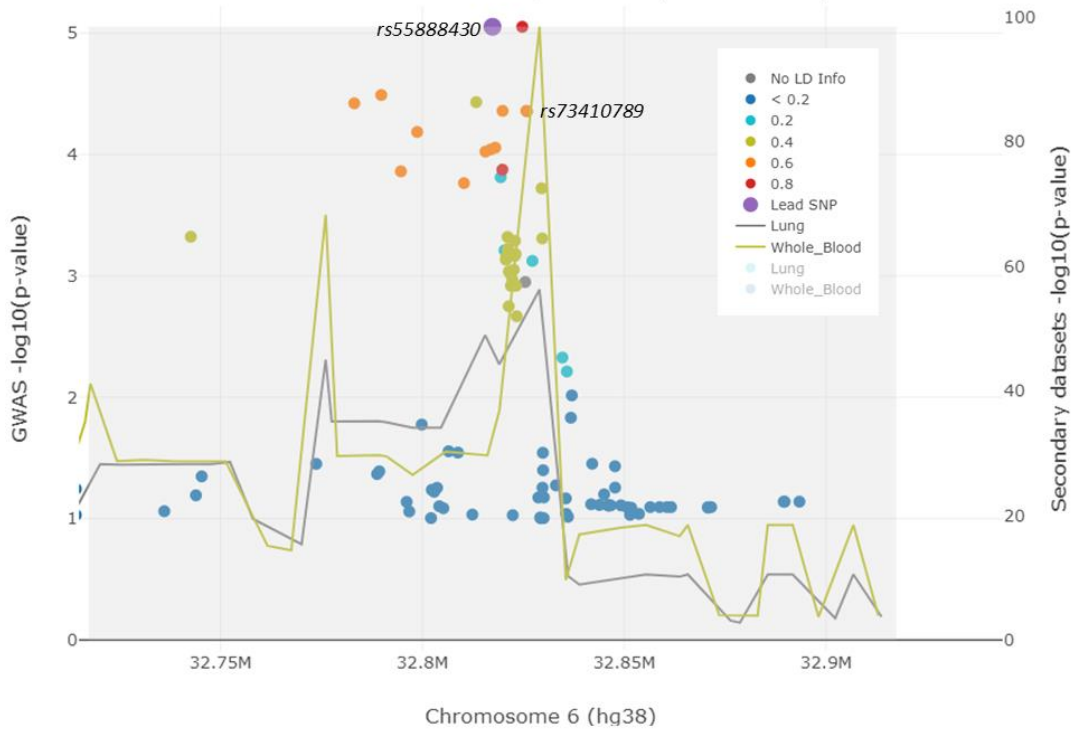

## Black Participants (n=528)

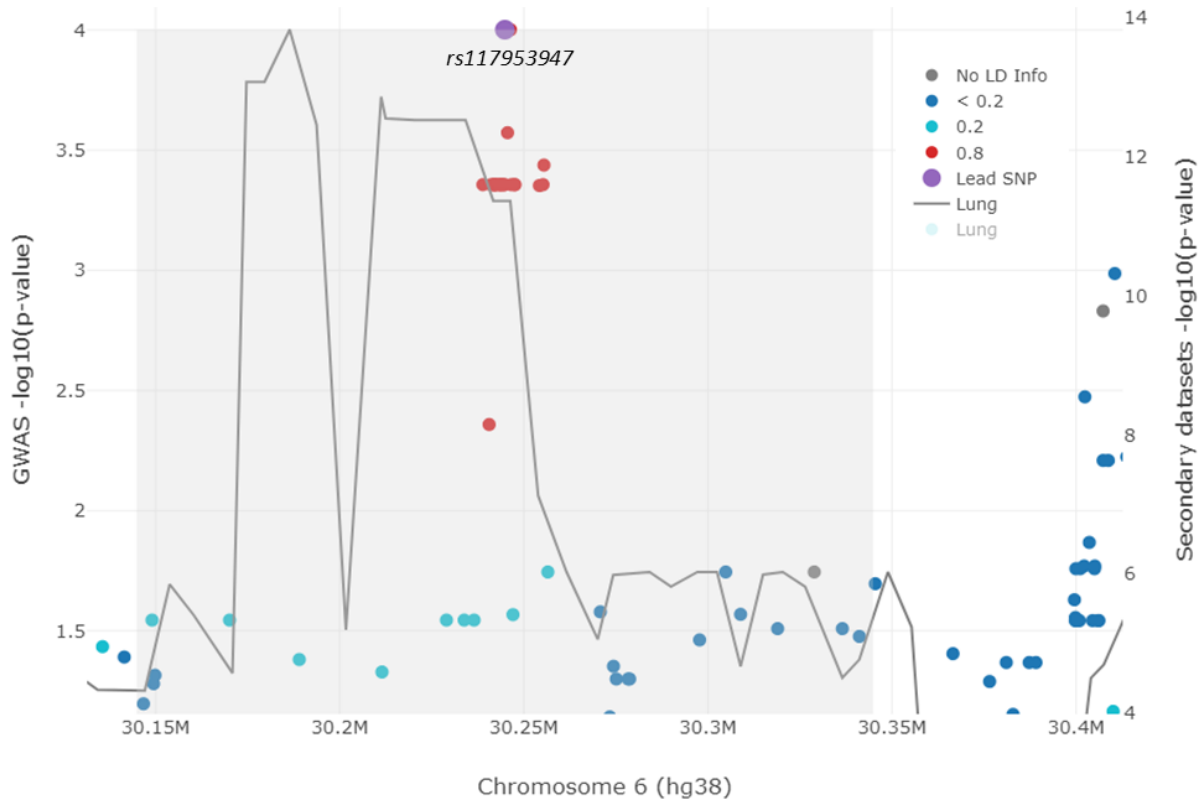

**Supplementary Figure S3.** LocusZoom plots of colocalization analysis results. The lead SNP for all participants (*rs9265901*) was not associated with the expression of *HLA-B* in lung tissue or whole blood. However, an SNP that was highly correlated with the lead SNP (*rs9265892*) was associated with the expression of *HLA-B* in whole blood. The lead SNP (*rs55888430*) for White participants was not associated with the expression of *HLA-DOB*. An LD SNP for the lead SNP (*rs73410789*) was associated with *HLA-DOB* expression in whole blood. The lead SNP for Black participants, *rs117953947*, was not associated with the expression of *HCG17* in lung tissue.

(a)

### Pooled/All

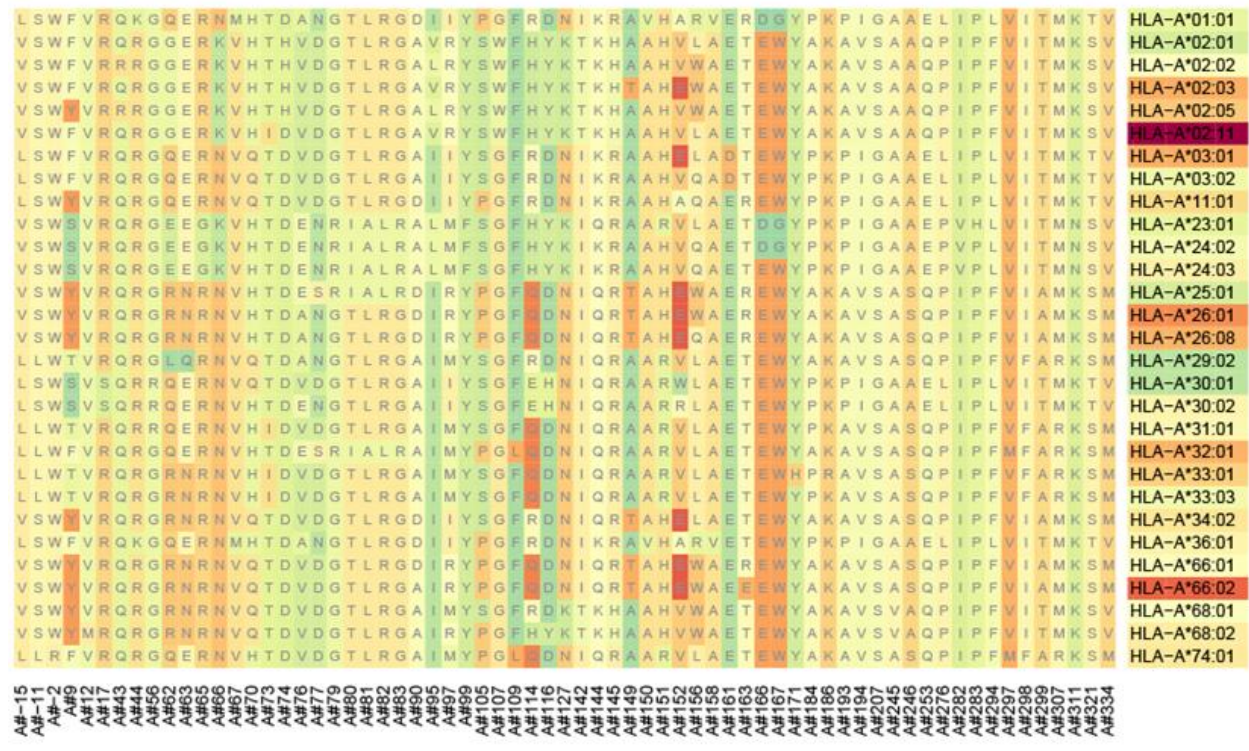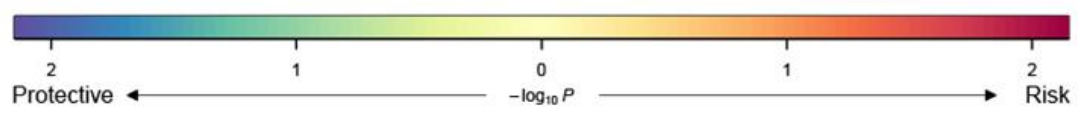

(b)

Pooled/All

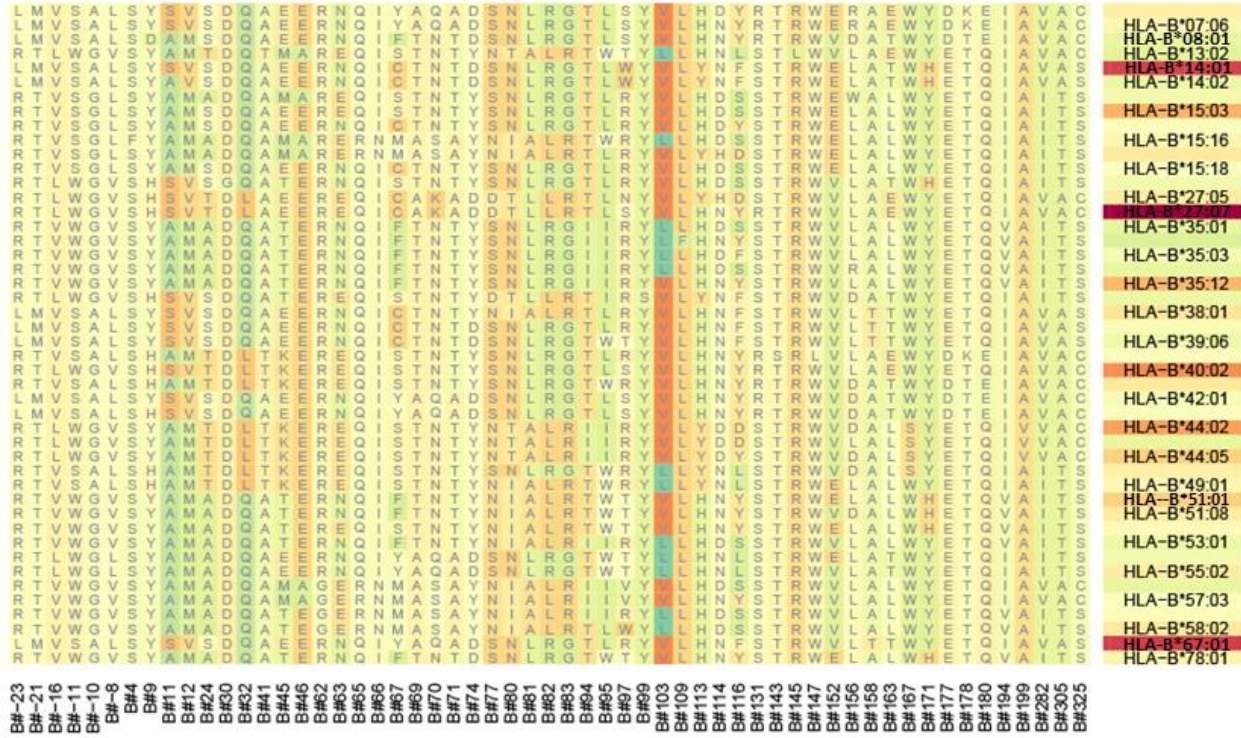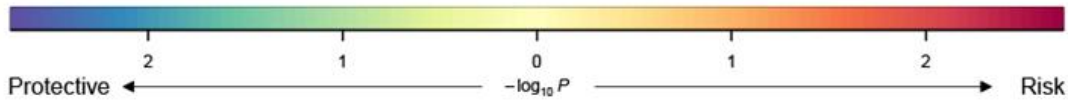

(c)

Pooled/All

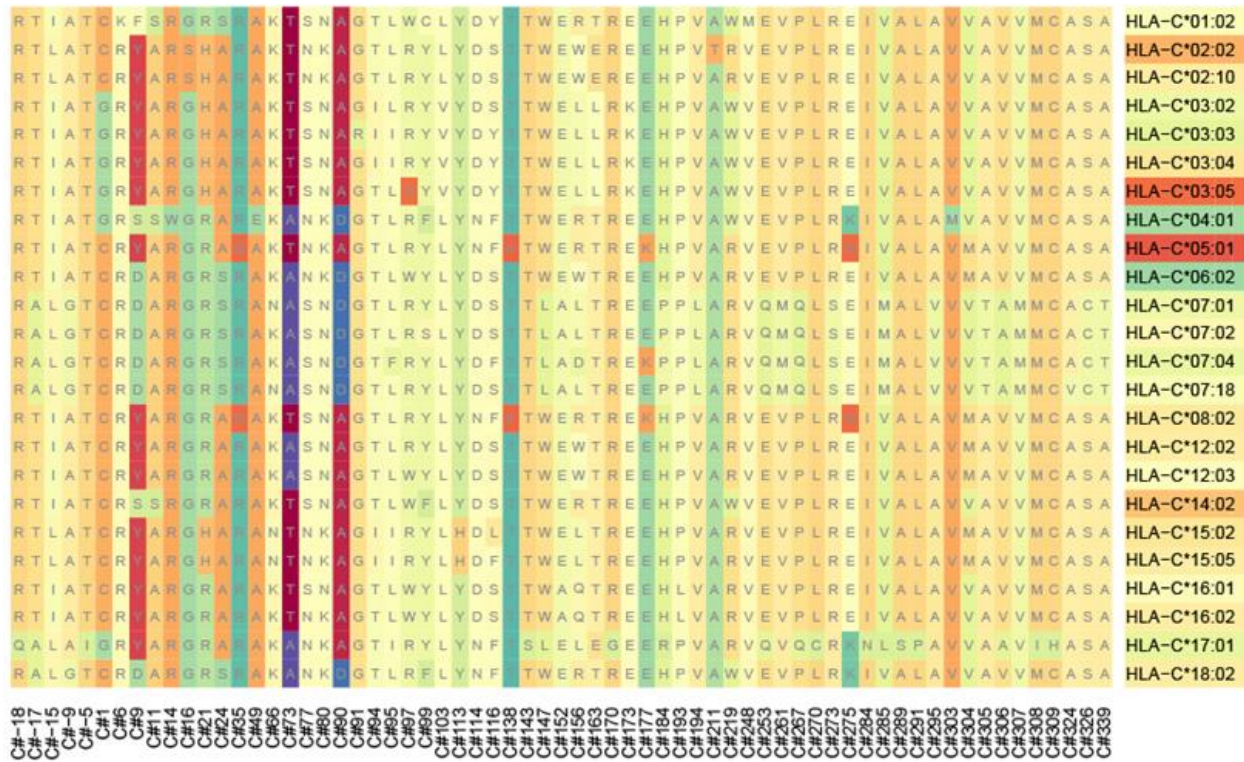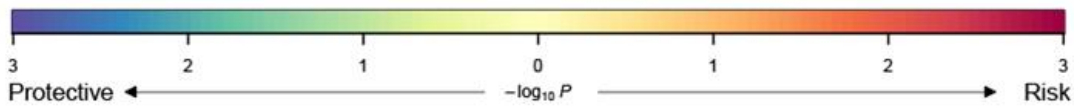



(e)

### Pooled/All

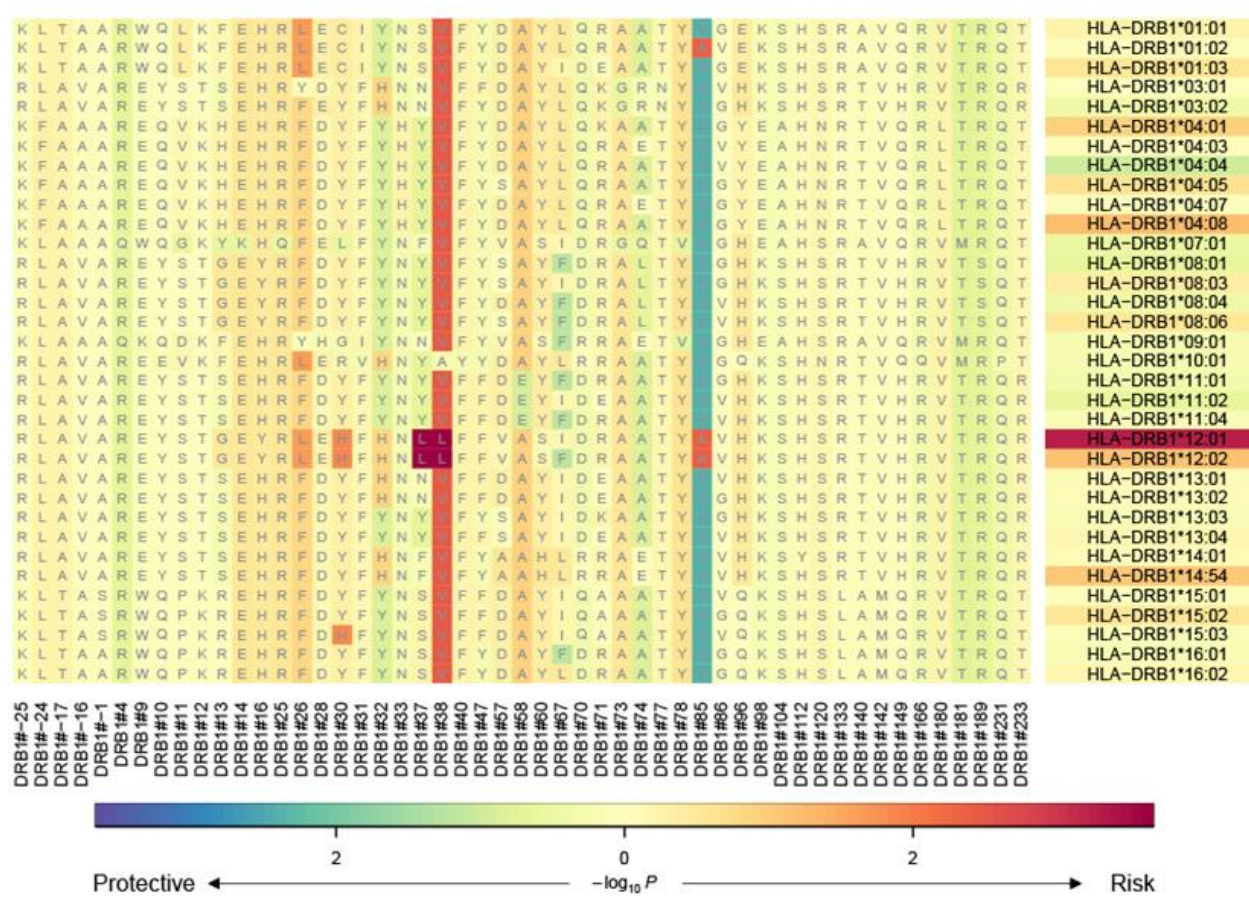

(f)

EUR

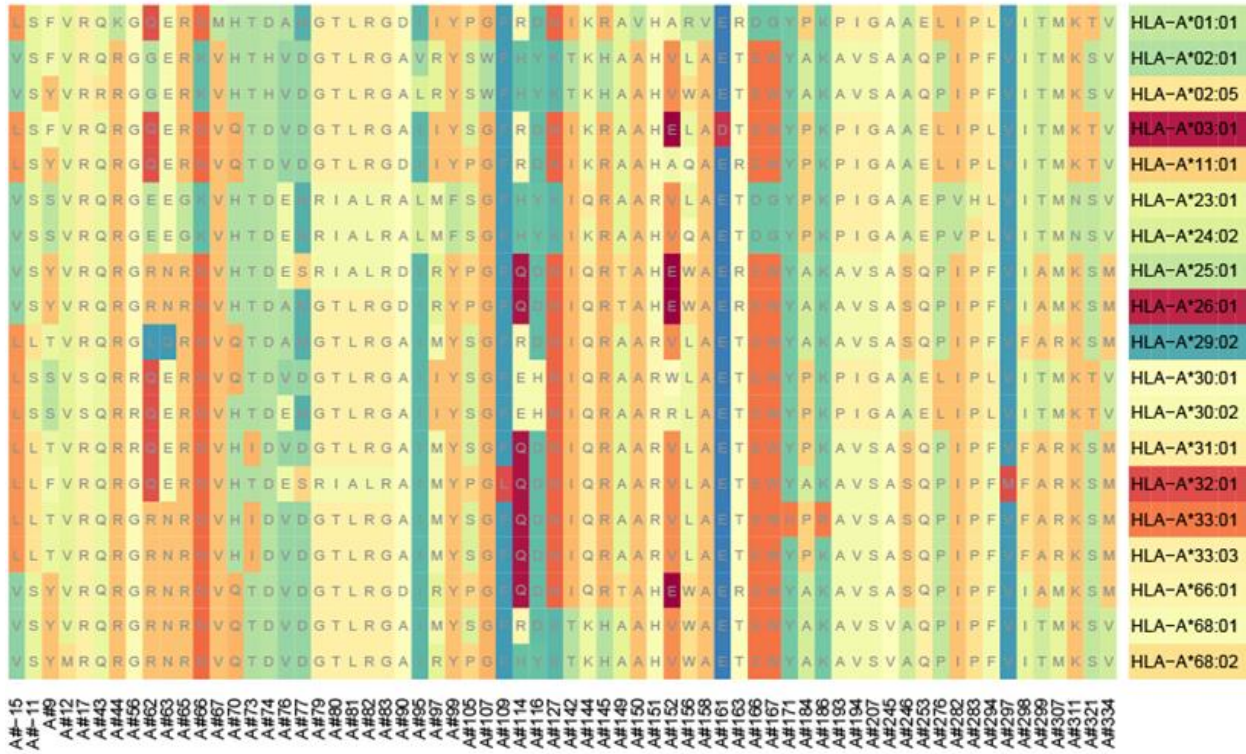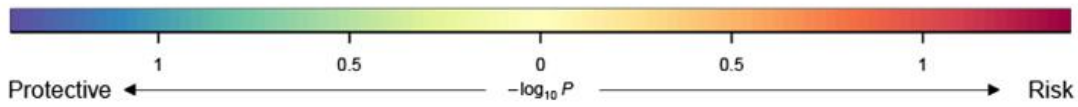



(g)

### EUR

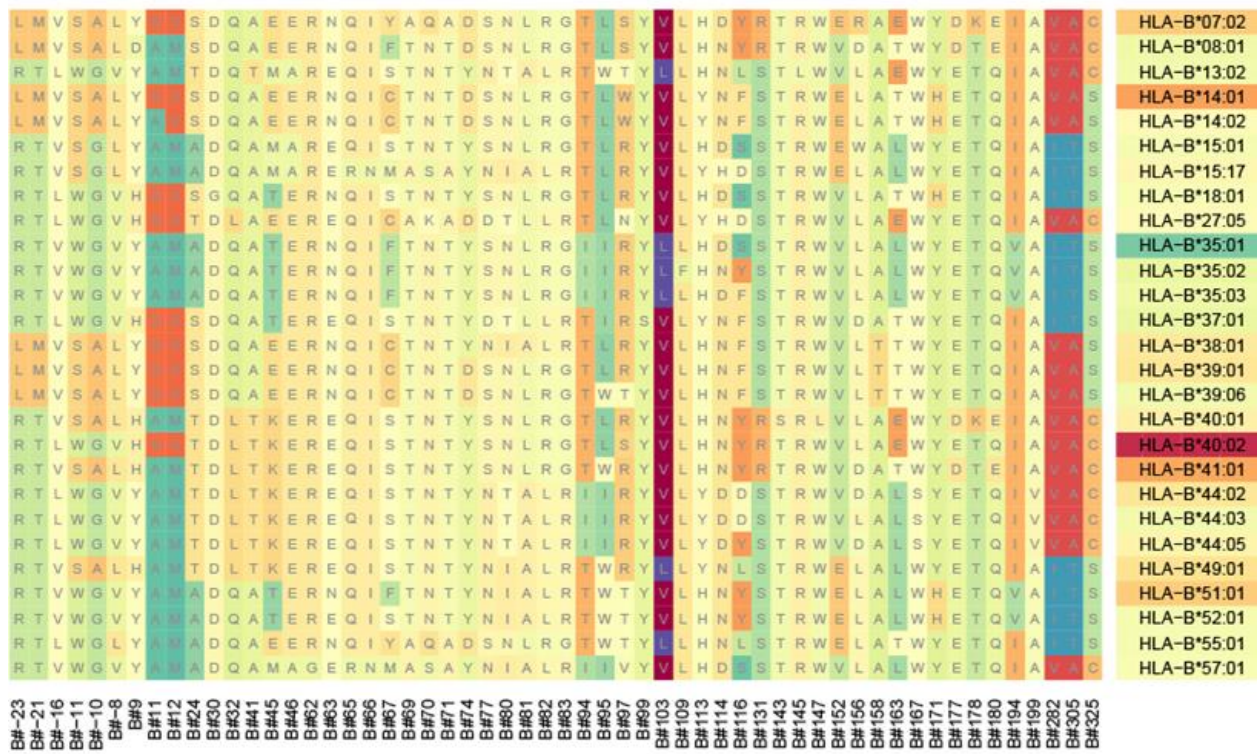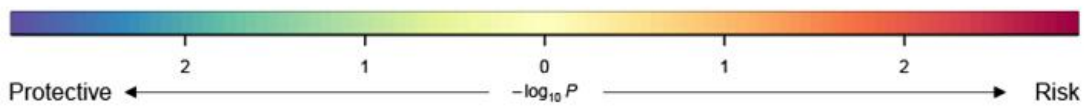

(h)

EUR

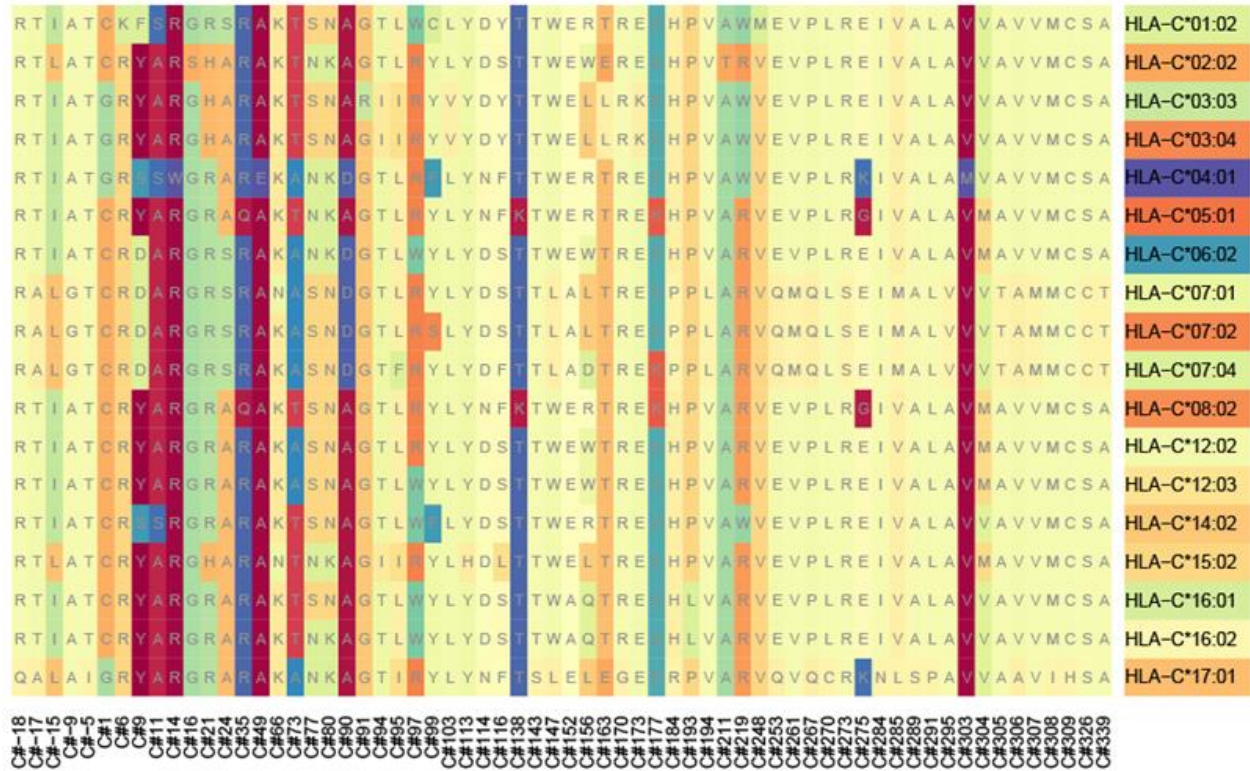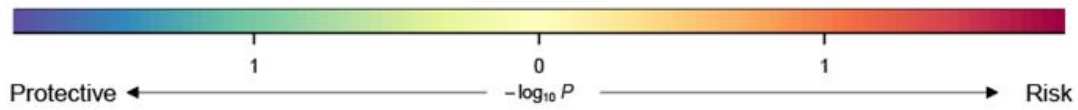

(i)

EUR

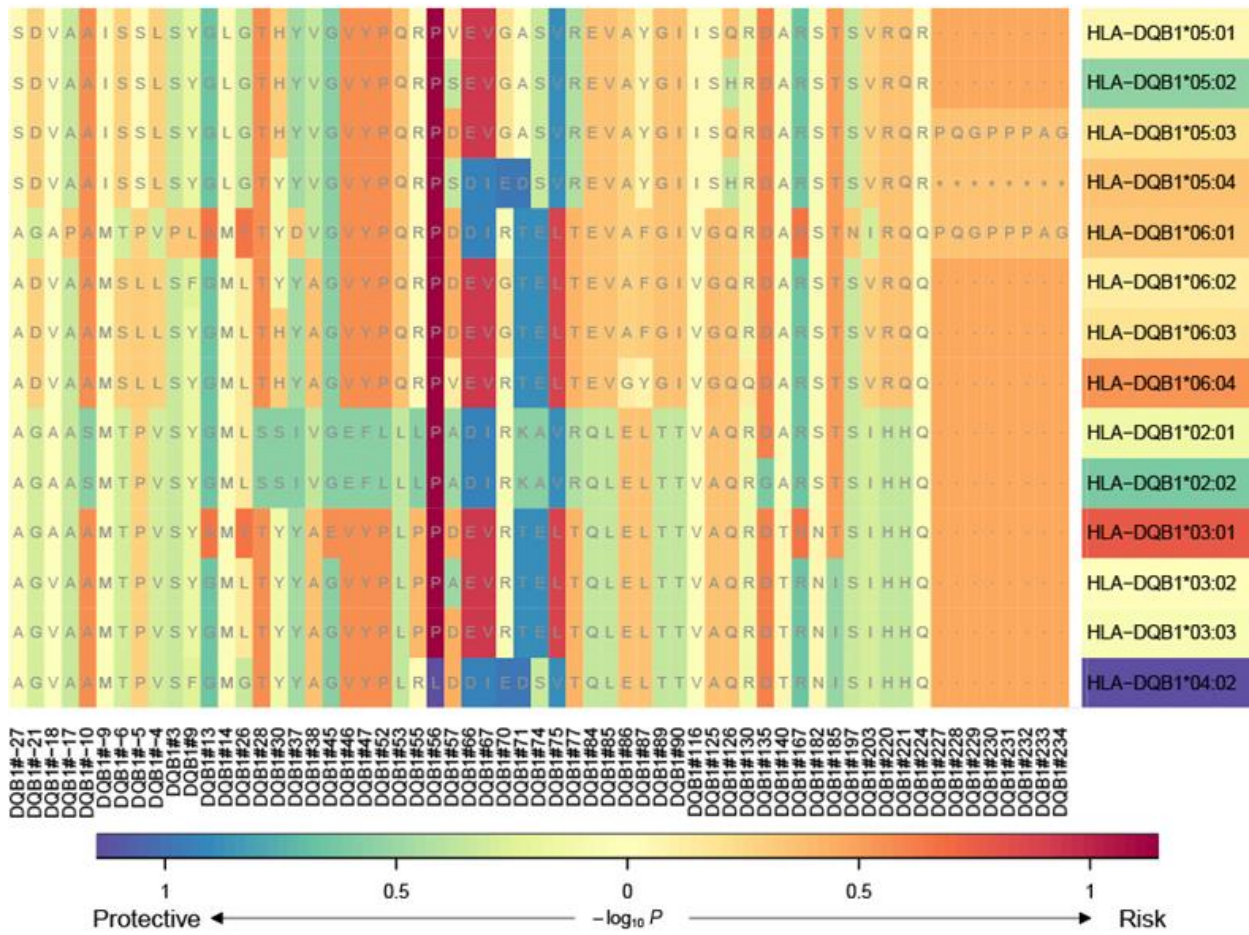

(j)

EUR

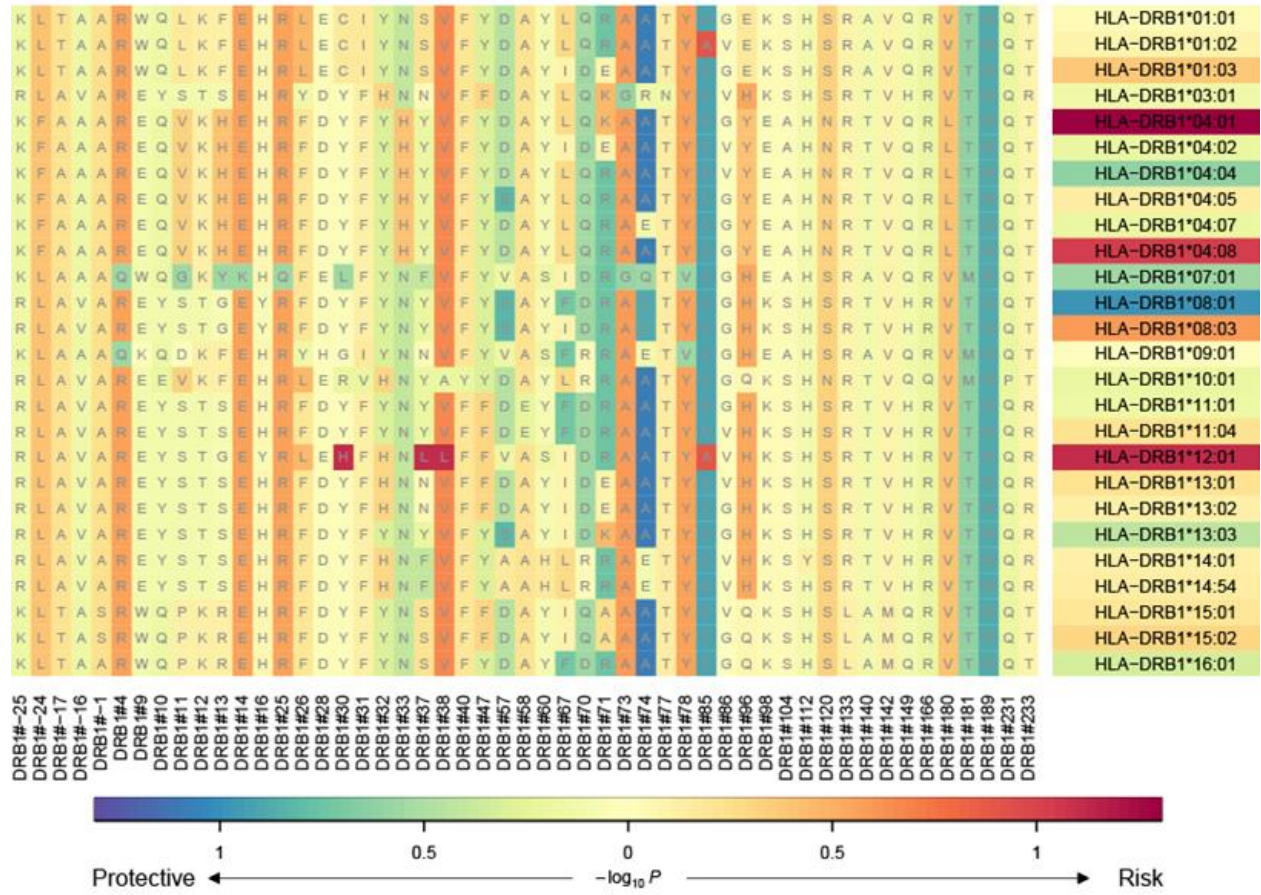

(k)

### AFR

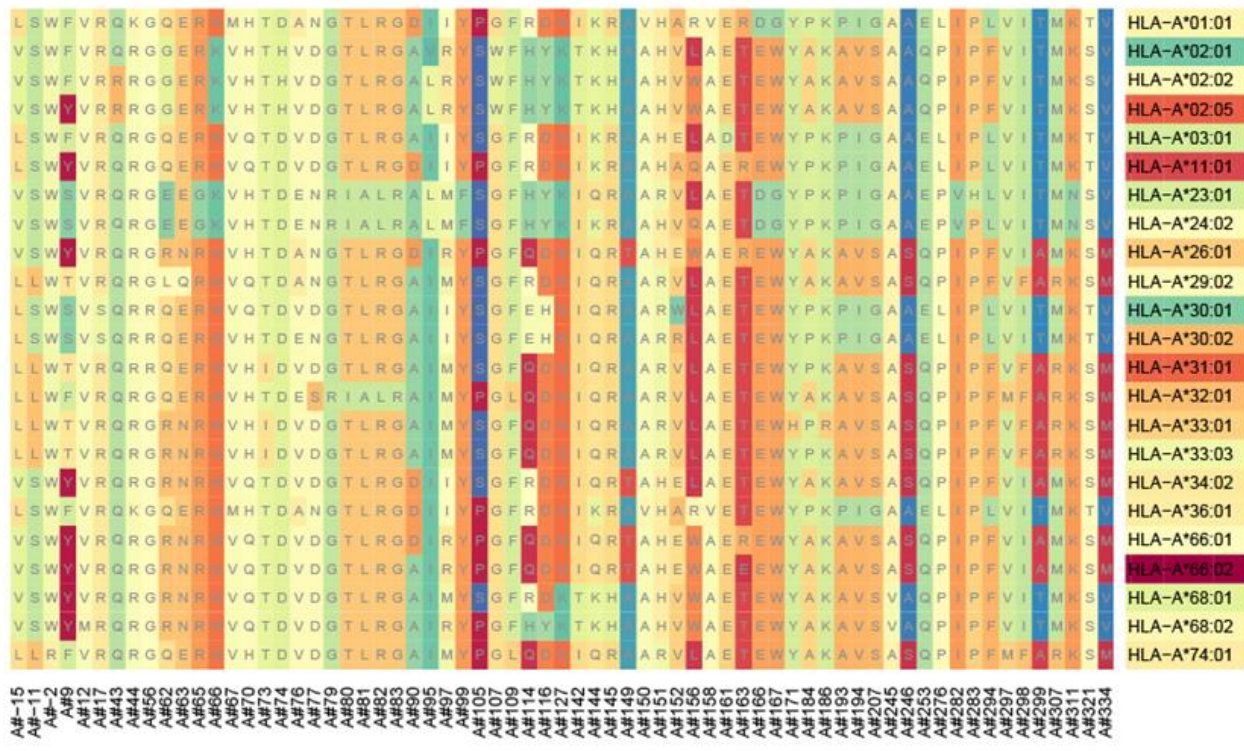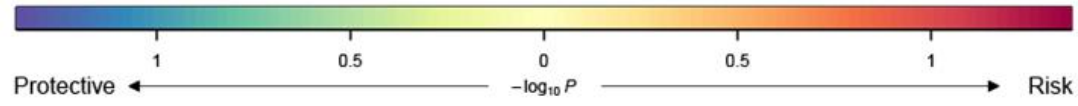

(I)

AFR

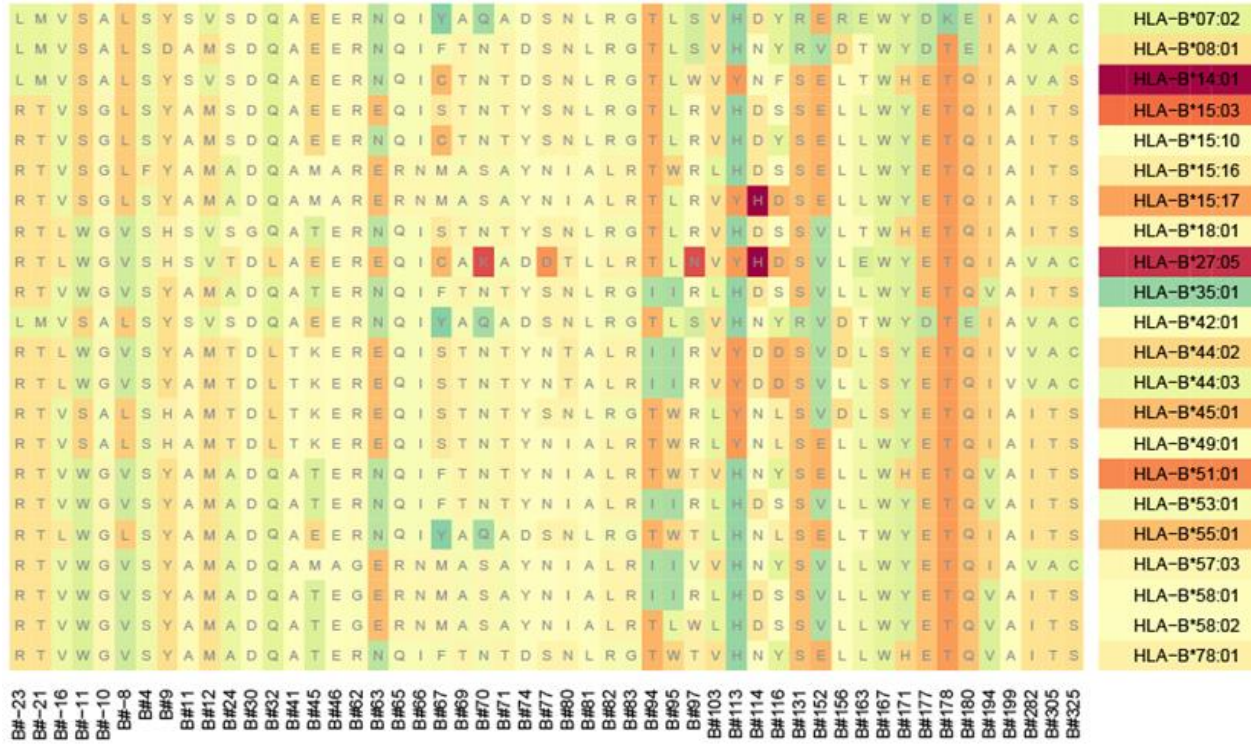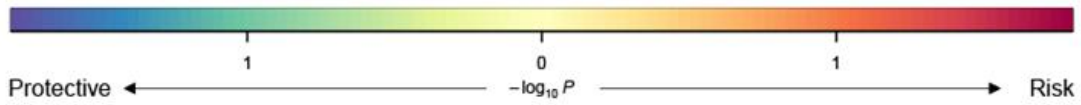

(m)

### AFR

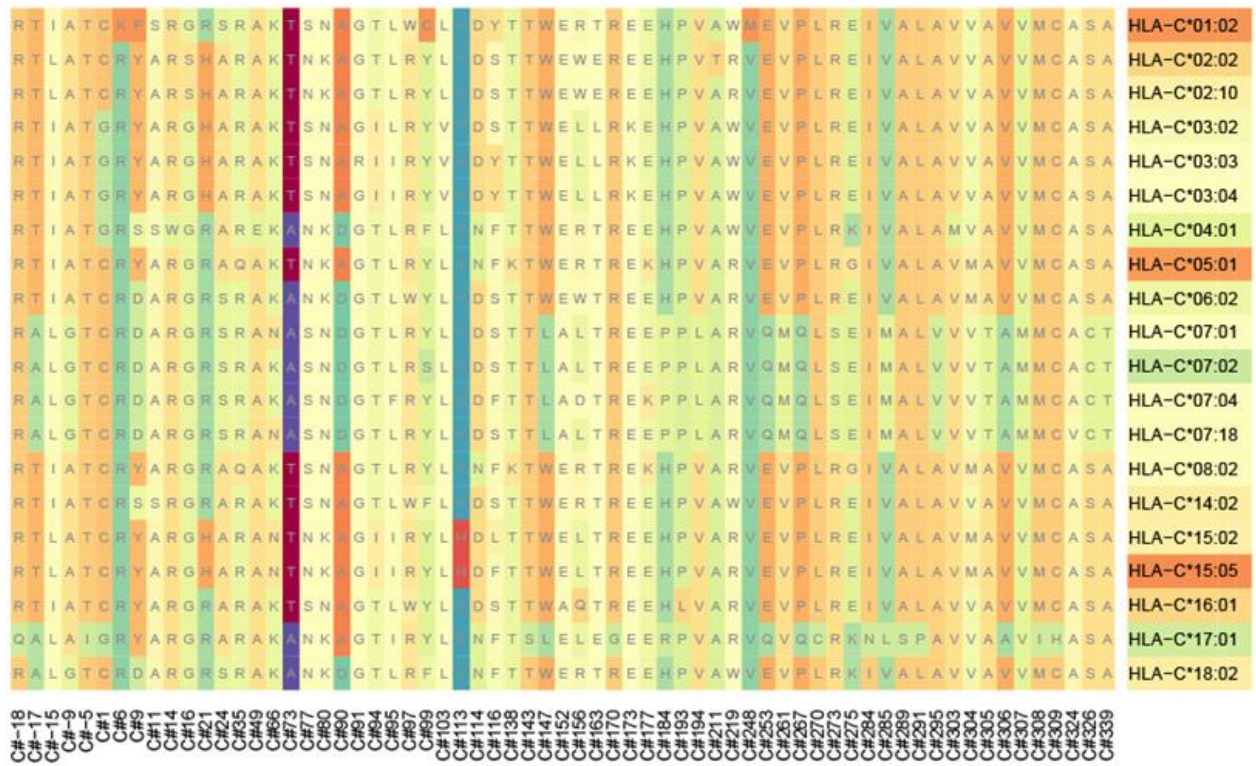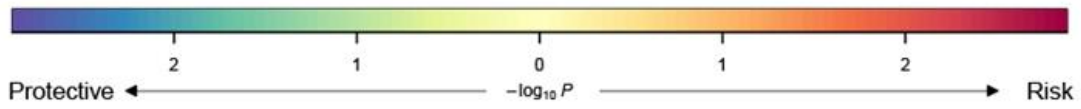

(n)

AFR

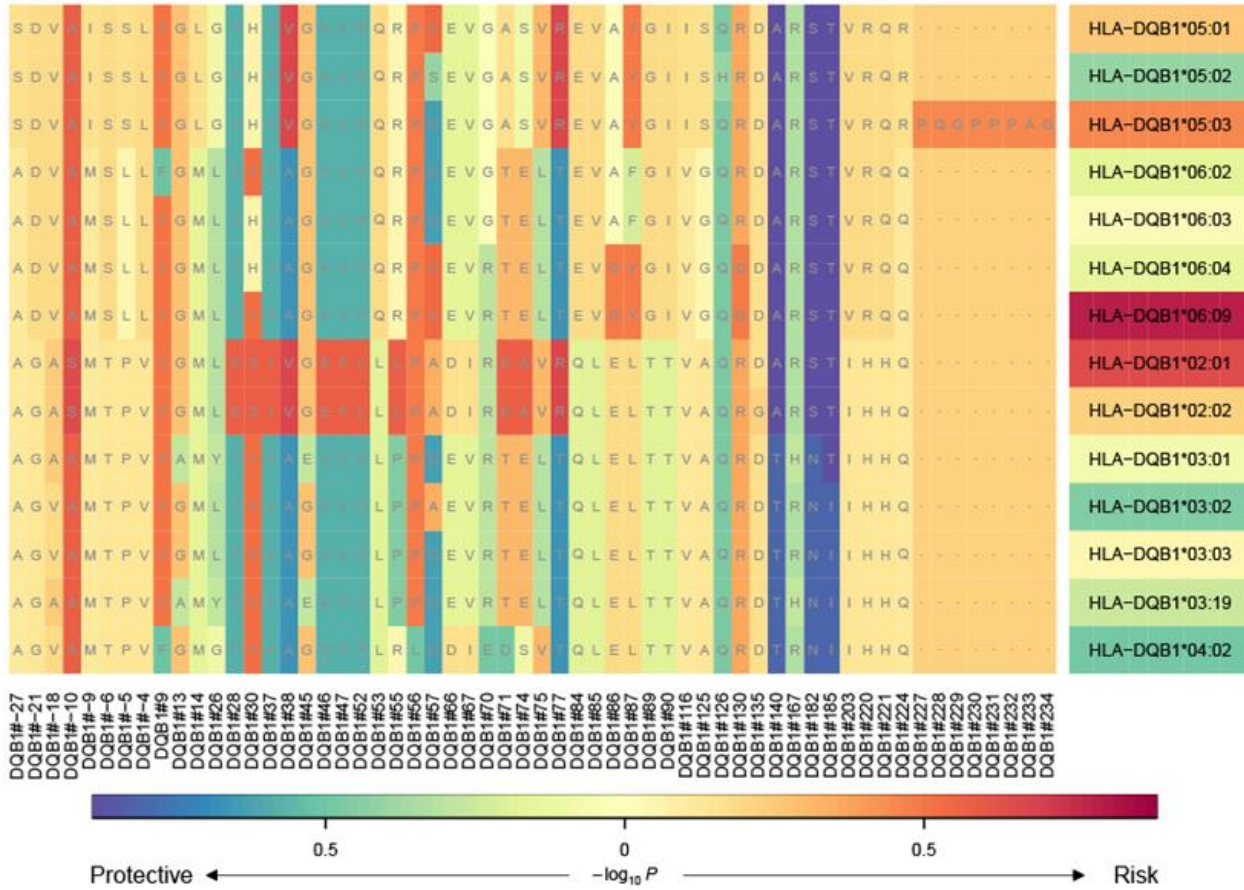



(o)

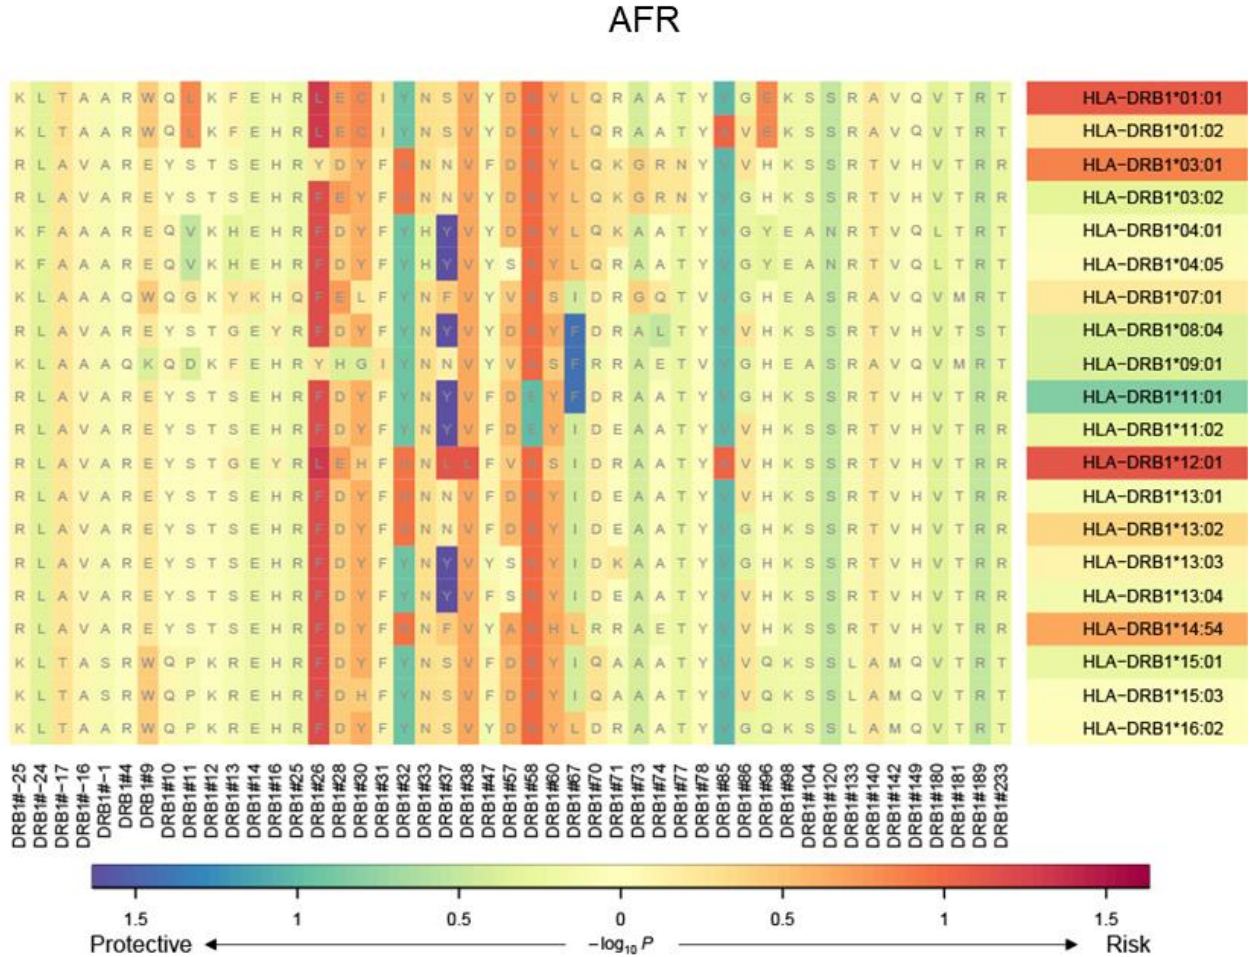

**Supplementary Figure S4.** Effects of individual residues at amino acid positions in HLA genes for pooled, European, and African ancestries. The color scheme represents the levels of effect and significance of the association between each amino acid residue at a given position for an HLA allele and late-onset asthma, adjusted for covariates. (a-e) HLA-A, HLA-B, HLA-C, HLA-DQB1, and HLA-DRB1 for pooled ancestries. (f-j) HLA-A, HLA-B, HLA-C, HLA-DQB1, and HLA-DRB1 for European ancestry. (k-o) HLA-A, HLA-B, HLA-C, HLA-DQB1, and HLA-DRB1 for African ancestry.

## 2.2 Supplementary Tables

**Supplementary Table S1.** Descriptive statistics for PEGS participants (n=3641)

|                                | Asthma Cases | Asthma Controls | P-value               |
|--------------------------------|--------------|-----------------|-----------------------|
| No. of participants            | 174          | 3467            |                       |
| <i>Age, mean ± SD (yr)</i>     | 54.3 ± 11.1  | 50.3 ± 14.8     | 4.1×10 <sup>-4†</sup> |
| <i>Male, N (%)</i>             | 27 (15.5)    | 1137 (32.8)     | 2.8×10 <sup>-6‡</sup> |
| <i>Ancestry, mean ± SD (%)</i> | 5            |                 |                       |
| <i>African</i>                 | 18.5 ± 32.8  | 12.6 ± 28.4     | 7.3×10 <sup>-3†</sup> |
| <i>Native American</i>         | 1.4 ± 3.4    | 1.8 ± 6.4       | 0.4†                  |
| <i>East Asian</i>              | 0.9 ± 1.6    | 2.7 ± 12.6      | 0.07†                 |
| <i>European</i>                | 76.6 ± 33.0  | 79.9 ± 31.5     | 0.2†                  |
| <i>Southeast Asian</i>         | 2.4 ± 6.6    | 3.0 ± 9.2       | 0.4†                  |

†We conducted unpaired two-sample t-tests for continuous variables.

‡We conducted two-proportion z-tests for categorical variables.

**Supplementary Table S2.** Results of fine-mapping of the MHC region harboring race/ethnicity-specific signals using sequenced data. We evaluated the joint effect of multiple variants on late-onset asthma using stepwise regression models. We conducted conditional analyses on race/ethnicity-specific lead SNPs to identify potential causal SNPs in the MHC region for all, White, and Black participants.

| All Participants       |                 |                       |                |              |                    |                       |
|------------------------|-----------------|-----------------------|----------------|--------------|--------------------|-----------------------|
| <i>Variants</i>        | <i>Position</i> | <i>Gene (nearest)</i> | <i>Alleles</i> | <i>Freq?</i> | <i>OR [95% CI]</i> | <i>P-value</i>        |
| rs9265901 <sup>†</sup> | 6:31345615      | HLA-B                 | A G            |              | 1.01 [1.00, 1.03]  | 0.05                  |
| rs59377618             | 6:32820360      | HLA-DOB               | T C            |              | 1.02 [1.01, 1.04]  | 4.42×10 <sup>-3</sup> |
| 6:33097139             | 6:33097139      | HLA-DPA1              | G A            |              | 0.98 [0.97, 0.99]  | 4.62×10 <sup>-3</sup> |
| rs2894334              | 6:33330567      | SMIM40                | A C            |              | 0.99 [0.98, 0.99]  | 0.01                  |
| rs5009448              | 6:29972711      | HLA-A                 | T C            |              | 1.01 [1.00, 1.02]  | 0.02                  |
| rs7767589              | 6:30402196      | RPP21                 | C T            |              | 1.07 [1.02, 1.13]  | 7.00×10 <sup>-3</sup> |
| rs73728546             | 6:31380112      | MICA                  | C T            |              | 1.05 [1.02, 1.09]  | 5.24×10 <sup>-3</sup> |
| rs4569                 | 6:31670030      | LY6G5B                | C T            |              | 0.98 [0.97, 0.99]  | 3.21×10 <sup>-3</sup> |
| 6:33061419             | 6:33061419      | HLA-DPB1              | C T            |              | 1.10 [1.05, 1.16]  | 2.23×10 <sup>-4</sup> |
| rs9268541              | 6:32416750      | BTNL2                 | T C            |              | 1.03 [1.00, 1.05]  | 0.02                  |
| rs62407970             | 6:32969217      | HLA-DMA               | G A            |              | 1.03 [1.01, 1.05]  | 6.89×10 <sup>-3</sup> |
| rs368207307            | 6:32524350      | HLA-DRB5              | C G            |              | 1.02 [0.97, 1.08]  | 0.46                  |
| rs16871255             | 6:32965252      | BRD2                  | T C            |              | 1.02 [0.99, 1.06]  | 0.23                  |
| rs3135333              | 6:32996007      | HLA-DOA               | T C            |              | 1.01 [0.99, 1.02]  | 0.12                  |
| rs13211714             | 6:33439483      | ZBTB9                 | A C            |              | 1.04 [0.99, 1.04]  | 0.11                  |
| rs2844624              | 6:31264470      | HLA-C                 | T C            |              | 0.99 [0.98, 1.00]  | 0.09                  |
| rs116062523            | 6:31383028      | MICA                  | T C            |              | 1.04 [0.99, 1.08]  | 0.08                  |

| White Participants             |            |                |     |  |                   |                       |
|--------------------------------|------------|----------------|-----|--|-------------------|-----------------------|
| <i>rs55888430<sup>†</sup></i>  | 6:32817365 | HLA-DOB        | G A |  | 1.03 [0.99, 1.07] | 0.06                  |
| <i>rs5009448</i>               | 6:29972711 | HLA-A          | T C |  | 1.02 [1.01, 1.03] | 1.65×10 <sup>-3</sup> |
| <i>rs116062523</i>             | 6:31383028 | MICA           | T C |  | 1.08 [1.03, 1.14] | 3.64×10 <sup>-3</sup> |
| <i>rs7754362</i>               | 6:33143251 | HCG24, COL11A2 | A C |  | 0.98 [0.97, 0.99] | 2.95×10 <sup>-4</sup> |
| <i>6:29800571</i>              | 6:29800571 |                | A C |  | 1.07 [1.01, 1.13] | 0.02                  |
| <i>6:29816791</i>              | 6:29816791 |                | A T |  | 1.05 [1.00, 1.10] | 0.04                  |
| <i>6:31932537</i>              | 6:31932537 | CFB            | T C |  | 1.07 [1.04, 1.11] | 2.91×10 <sup>-5</sup> |
| <i>rs1632859</i>               | 6:31002121 | MUC22          | G A |  | 1.01 [1.00, 1.03] | 0.04                  |
| <i>rs17208209</i>              | 6:32227599 | NOTCH4         | G A |  | 1.04 [1.00, 1.08] | 0.04                  |
| <i>rs115337486</i>             | 6:33387741 | KIFC1          | C T |  | 1.04 [1.00, 1.08] | 0.04                  |
| <i>rs2040748</i>               | 6:31276008 | HLA-C          | G T |  | 0.99 [0.98, 1.01] | 0.73                  |
| <i>rs116745041</i>             | 6:32955914 | BRD2           | G A |  | 1.02 [0.97, 1.06] | 0.45                  |
| <i>rs3134772</i>               | 6:31235440 | HLA-C          | G C |  | 1.01 [0.99, 1.02] | 0.44                  |
| <i>rs9258130</i>               | 6:29710011 | HLA-F          | G A |  | 1.02 [0.98, 1.07] | 0.25                  |
| <i>rs2442753</i>               | 6:31383956 | MICA           | T C |  | 0.99 [0.98, 1.01] | 0.24                  |
| <i>rs186455495</i>             | 6:31311038 | HLA-C          | T A |  | 1.03 [0.99, 1.06] | 0.07                  |
| <i>rs183006581</i>             | 6:30674381 | DHX16          | C T |  | 1.04 [0.99, 1.08] | 0.06                  |
| <i>rs9265866</i>               | 6:31344981 | HLA-B          | C T |  | 1.02 [0.99, 1.03] | 0.06                  |
| Black Participants             |            |                |     |  |                   |                       |
| <i>rs117953947<sup>§</sup></i> | 6:30244862 | TRIM26, HCG17  | G A |  | 1.13 [0.98, 1.30] | 0.09                  |

|                    |            |               |     |  |                   |                       |
|--------------------|------------|---------------|-----|--|-------------------|-----------------------|
| <i>rs150891754</i> | 6:28608725 | ZBED9         | A G |  | 1.27 [1.13, 1.44] | 1.20×10 <sup>-4</sup> |
| <i>rs17200414</i>  | 6:31449359 | MICB          | C T |  | 1.21 [1.05, 1.38] | 7.90×10 <sup>-3</sup> |
| <i>rs200535118</i> | 6:31352792 | HLA-B         | G T |  | 1.19 [1.01, 1.40] | 0.04                  |
| <i>rs62408569</i>  | 6:29406052 | OR5V1, OR12D2 | C T |  | 1.31 [1.13, 1.52] | 4.04×10 <sup>-4</sup> |
| <i>rs181714996</i> | 6:33331782 | SMIM40        | T C |  | 1.19 [1.07, 1.32] | 1.05×10 <sup>-3</sup> |
| <i>rs115571466</i> | 6:32998090 | HLA-DOA       | A G |  | 1.20 [1.07, 1.35] | 1.71×10 <sup>-3</sup> |
| <i>rs4713423</i>   | 6:31034524 | MUC22         | G C |  | 1.04 [1.00, 1.08] | 0.03                  |
| <i>rs17198965</i>  | 6:31308446 | HLA-C         | C G |  | 1.08 [1.02, 1.16] | 0.01                  |
| <i>rs73403122</i>  | 6:32501344 | HLA-DRB5      | A G |  | 1.21 [1.07, 1.36] | 1.92×10 <sup>-3</sup> |
| <i>rs17422797</i>  | 6:32297751 | NOTCH4        | C T |  | 1.26 [1.09, 1.44] | 1.38×10 <sup>-3</sup> |
| <i>rs79735834</i>  | 6:29517075 | MAS1L         | A G |  | 1.08 [1.02, 1.15] | 0.01                  |
| <i>rs187569734</i> | 6:31044172 | MUC22         | G A |  | 1.28 [1.11, 1.48] | 6.82×10 <sup>-4</sup> |
| <i>rs2245731</i>   | 6:31262189 | HLA-C         | T C |  | 1.01 [0.97, 1.04] | 0.70                  |
| <i>rs3135356</i>   | 6:32423739 | HLA-DRA       | G A |  | 1.03 [0.96, 1.10] | 0.39                  |
| <i>rs4569</i>      | 6:31670030 | LY6G5B        | C T |  | 1.02 [0.99, 1.05] | 0.25                  |
| <i>rs114008864</i> | 6:30410517 | RPP21         | G A |  | 1.05 [0.98, 1.13] | 0.17                  |
| <i>rs3915970</i>   | 6:31301683 | HLA-C         | T C |  | 1.04 [0.99, 1.09] | 0.16                  |
| <i>rs148696809</i> | 6:28966575 | ZNF311        | T C |  | 1.11 [0.99, 1.24] | 0.06                  |

<sup>†</sup>Odds ratios represent the association between the lead SNPs (*rs9265901*, *rs55888430*, *rs117953947*) and late-onset asthma, adjusted for covariates and additional SNPs, in forward stepwise regression analyses. We adjusted all regression models for age, sex, and four ancestries.

**Supplementary Table S3.** Functional annotation of variants identified from fine-mapping analyses in the MHC region (chr6: 28,510,120-33,480,577). We gathered information on each variant's potential genomic regulatory role from publicly available data, including quantitative measures of functional importance (CADD score and RegDB rank and score), indication of functional genomic elements (ENCODE), and long-range chromatic interactions (Hi-C data from HUGIn) for all, White/Non-Hispanic, and Black/Non-Hispanic participants.

| All Participants   |               |      |                    |       |                               |                                                                                        |              |             |
|--------------------|---------------|------|--------------------|-------|-------------------------------|----------------------------------------------------------------------------------------|--------------|-------------|
| Variants           | chr:BP (hg38) | CADD | RegDB <sup>†</sup> |       | ENCODE                        |                                                                                        | Hi-C (IMR90) |             |
|                    |               |      | Rank               | Score | Target of Assay               | Bio-sample                                                                             | IMR90        | MES         |
| <i>rs9265901</i>   | 6:31345615    | 7.50 | 4                  | 0.61  |                               |                                                                                        | HCG27        | HCG27       |
| <i>rs59377618</i>  | 6:32820360    | 6.50 | 5                  | 0.13  |                               |                                                                                        | BTNL2        | HLA-DMA     |
| <i>rs3130201</i>   | 6:33097139    | 1.72 | 5                  | 0.29  |                               |                                                                                        | HLA-DPB2     | HLA-DPB2    |
| <i>rs2894334</i>   | 6:33330567    | 1.24 | 5                  | 0.34  |                               |                                                                                        | KIFC1        | HLA-DPB2    |
| <i>rs5009448</i>   | 6:29972711    | 5.41 | 4                  | 0.61  |                               |                                                                                        | HLA-G, HCG4  | HLA-G, HCG4 |
| <i>rs7767589</i>   | 6:30402196    | 2.72 | 5                  | 0.13  |                               |                                                                                        | TIM26        | TRIM26      |
| <i>rs73728546</i>  | 6:31380112    | 0.11 | 5                  | 0.13  | DNase, H3K4me3, H3K27ac, CTCF | Lung, B-cell, T-cell (CD4 <sup>+</sup> , CD8 <sup>+</sup> , helper), CD14 <sup>+</sup> |              |             |
| <i>rs4569</i>      | 6:31670030    | 21.5 | 1f                 | 0.55  |                               |                                                                                        | MSH5; CLIC1  | NEU1        |
| <i>rs566687684</i> | 6:33061419    | 0.76 | 7                  | 0.18  |                               |                                                                                        | HLA-DPB2     | HLA-DPB2    |

|                           |            |      |    |      |      |              |                                   |                                      |
|---------------------------|------------|------|----|------|------|--------------|-----------------------------------|--------------------------------------|
| <i>rs9268541</i>          | 6:32416750 | 0.12 | 5  | 0.59 |      |              | HLA-DOB                           | HLA-DQB2                             |
| <i>rs62407970</i>         | 6:32969217 | 15.8 | 2b | 0.82 | CTCF | Lung, B-cell | HLA-DPB2                          | HLA-DPB2                             |
| <i>rs368207307</i>        | 6:32524350 | 11.5 | 5  | 0.65 |      |              | HLA-DRB1 HLA-DRB6                 |                                      |
| <i>rs16871255</i>         | 6:32965252 | 0.59 | 2b | 0.01 |      |              | HLA-DPB2                          | HLA-DPB2                             |
| <i>rs3135333</i>          | 6:32996007 | 1.92 | 5  | 0.17 |      |              | HLA-DPB2                          | HLA-DPB2                             |
| <i>rs13211714</i>         | 6:33439483 | 13.1 | 4  | 0.61 |      |              | PHF1<br>KIFC1                     |                                      |
| <i>rs2844624</i>          | 6:31264470 | 6.67 | 6  | 0.49 |      |              | PSORS1C1 CDSN<br>C6orf15 PSORS1C2 | PSORS1C1 CDSN<br>C6orf15<br>PSORS1C2 |
| <i>rs116062523</i>        | 6:31383028 | 11.7 | 4  | 0.61 |      |              |                                   |                                      |
|                           |            |      |    |      |      |              |                                   |                                      |
| <b>White Participants</b> |            |      |    |      |      |              |                                   |                                      |
| <i>rs55888430</i>         | 6:32817365 | 1.07 | 4  | 0.61 |      |              | BTNL2                             | BTNL2                                |
| <i>rs5009448</i>          | 6:29972711 | 5.41 | 4  | 0.61 |      |              | HLA-G, HCG4                       | HLA-G, HCG4                          |

|                     |            |       |    |      |                                  |                                                                    |                                   |                                      |
|---------------------|------------|-------|----|------|----------------------------------|--------------------------------------------------------------------|-----------------------------------|--------------------------------------|
| <i>rs116062523</i>  | 6:31383028 | 11.7  | 4  | 0.61 |                                  |                                                                    |                                   |                                      |
| <i>rs7754362</i>    | 6:33143251 | 6.14  | 4  | 0.61 | DNase, H3K4me3,<br>H3K27ac, CTCF | IMR-90, lung, T-<br>cell, B- cell,<br>bronchial epithelial<br>cell | HLA-DMA, BRD2                     | HLA-DMA, BRD2                        |
| <i>rs1205233282</i> | 6:29800571 | .     | 5  | 0.13 |                                  |                                                                    |                                   |                                      |
| <i>rs41316358</i>   | 6:29816791 | .     | 5  |      |                                  |                                                                    | HLA-J                             | HLA-J                                |
| <i>rs529698255</i>  | 6:31932537 | 2.54  | 7  | 0.18 |                                  |                                                                    | MSH5                              | HLA-DOB                              |
| <i>rs1632859</i>    | 6:31002121 | 2.13  | 4  | 0.61 |                                  |                                                                    | HCG22                             | HCG22                                |
| <i>rs17208209</i>   | 6:32227599 | 1.81  | 4  | 0.61 |                                  |                                                                    | HLA-DOB                           | HLA-DOB                              |
| <i>rs115337486</i>  | 6:33387741 | 0.012 | 7  | 0.18 |                                  |                                                                    | DAXX                              |                                      |
| <i>rs2040748</i>    | 6:31276008 | 13.4  | 7  | 0.51 |                                  |                                                                    |                                   |                                      |
| <i>rs116745041</i>  | 6:32955914 | 1.02  | 4  | 0.61 |                                  |                                                                    | HLA-DPB2                          | HLA-DPB2                             |
| <i>rs3134772</i>    | 6:31235440 | 4.02  | 3a | 0.60 |                                  |                                                                    | PSORS1C1 CDSN<br>C6orf15 PSORS1C2 | PSORS1C1 CDSN<br>C6orf15<br>PSORS1C2 |



|                           |            |      |    |      |       |                         |                         |                         |
|---------------------------|------------|------|----|------|-------|-------------------------|-------------------------|-------------------------|
| <i>rs9258130</i>          | 6:29710011 | 0.66 | 5  | 0.13 |       |                         |                         |                         |
| <i>rs2442753</i>          | 6:31383956 | 5.77 | 5  | 0.18 |       |                         |                         |                         |
| <i>rs186455495</i>        | 6:31311038 | 6.27 | 7  | 0.18 |       |                         |                         |                         |
| <i>rs183006581</i>        | 6:30674381 | 0.03 | 7  | 0.18 |       |                         | TUBB MDC1 IER3<br>FLOT1 | TUBB MDC1 IER3<br>FLOT1 |
| <i>rs9265866</i>          | 6:31344981 | 7.33 | 4  | 0.61 |       |                         | HCG27                   | HCG27                   |
| <b>Black Participants</b> |            |      |    |      |       |                         |                         |                         |
| <i>rs117953947</i>        | 6:30244862 | 0.69 | 3a | 0.61 |       |                         | RPP21                   | RPP21                   |
| <i>rs150891754</i>        | 6:28608725 | 1.74 | 4  | 0.61 |       |                         |                         | GPX5, GPX6              |
| <i>rs17200414</i>         | 6:31449359 | 3.11 | 5  | 0.13 |       |                         | HLA-C                   |                         |
| <i>rs200535118</i>        | 6:31352792 | 0.18 | 3a | 0.61 |       |                         |                         |                         |
| <i>rs62408569</i>         | 6:29406052 | 8.47 | 5  | 0.13 |       |                         | ZNF311                  | LINC01015               |
| <i>rs181714996</i>        | 6:33331782 | 1.07 | 5  | 1.0  |       |                         | KIFC1                   |                         |
| <i>rs115571466</i>        | 6:32998090 | 7.91 | 5  | 0.13 |       |                         | HLA-DPB2                | HLA-DPB2                |
| <i>rs4713423</i>          | 6:31034524 | 2.04 | 5  | 0.33 |       |                         | MUC22                   | MUC22                   |
| <i>rs17198965</i>         | 6:31308446 | 9.43 | 4  | 0.61 | DNase | Colon, adrenal<br>gland |                         |                         |

|                    |            |      |    |      |  |  |                                      |                                      |
|--------------------|------------|------|----|------|--|--|--------------------------------------|--------------------------------------|
| <i>rs73403122</i>  | 6:32501344 | 9.21 | 3a | 0.96 |  |  |                                      | HLA-DRB1, HLA-DRB6                   |
| <i>rs17422797</i>  | 6:32297751 | 6.24 | 5  | 0.54 |  |  | HLA-DOB                              | HLA-DOB                              |
| <i>rs79735834</i>  | 6:29517075 | 2.77 | 4  | 0.61 |  |  | MAS1L                                | MAS1L                                |
| <i>rs187569734</i> | 6:31044172 | 0.83 | 3a | 0.57 |  |  | MUC22                                | MUC22                                |
| <i>rs2245731</i>   | 6:31262189 | 7.33 | 7  | 0.18 |  |  | PSORS1C1 CDSN<br>C6orf15<br>PSORS1C2 | PSORS1C1 CDSN<br>C6orf15<br>PSORS1C2 |
| <i>rs3135356</i>   | 6:32423739 | 0.19 | 3a | 0.85 |  |  | HLA-DOB                              | HLA-DQB2                             |
| <i>rs4569</i>      | 6:31670030 | 21.5 | 1f | 0.55 |  |  | MSH5                                 | NEU1                                 |
| <i>rs114008864</i> | 6:30410517 | 1.36 | 7  | 0.18 |  |  | TRIM26                               | TRIM26                               |
| <i>rs3915970</i>   | 6:31301683 | 7.20 | 3a | 0.70 |  |  |                                      |                                      |
| <i>rs148696809</i> | 6:28966575 | 1.57 | 5  | 0.59 |  |  |                                      |                                      |

†The RegulomeDB score represents the likelihood that a variant is located in a functional region. The RegulomeDB variant classification scheme is defined in Boyle et al.<sup>12</sup>

*Likely to affect binding*

2b: TF binding + matched TF motif + matched DNase footprint + DNase peak

*Minimal binding evidence*

4: TF binding + DNase peak

5: TF binding or DNase peak

6: Motif hit

**Supplementary Table S4.** Full list of candidate loci for eQTLs. Some of the candidate causal variants identified from conditional analyses were weakly to strongly correlated with expression in multiple genes in lung tissue and whole blood according to the GTEx database.

| <b>All Participants</b> |            |                        |                     | <b>Lung Tissue (GTEx)</b> |                       |                 | <b>Whole Blood (GTEx)</b> |                       |                 |
|-------------------------|------------|------------------------|---------------------|---------------------------|-----------------------|-----------------|---------------------------|-----------------------|-----------------|
| <i>SNP ID</i>           | <i>chr</i> | <i>Position (hg38)</i> | <i>Minor Allele</i> | <i>βeta</i>               | <i>P-value</i>        | <i>Gene</i>     | <i>βeta</i>               | <i>P-value</i>        | <i>Gene</i>     |
| <i>rs9265901</i>        | 6          | 31345615               | G                   | -0.51                     | 5.0×10 <sup>-22</sup> | <i>HLA-C</i>    | -0.23                     | 1.2×10 <sup>-10</sup> | <i>HLA-C</i>    |
| <i>rs9265901</i>        | 6          | 31345615               | G                   | 0.52                      | 1.7×10 <sup>-11</sup> | <i>HLA-S</i>    | 0.53                      | 1.4×10 <sup>-15</sup> | <i>HLA-S</i>    |
| <i>rs59377618</i>       | 6          | 32820360               | C                   | -0.26                     | 1.4×10 <sup>-4</sup>  | <i>HLA-DOB</i>  | -0.24                     | 5.6×10 <sup>-10</sup> | <i>HLA-DOB</i>  |
| <i>rs3130201</i>        | 6          | 33097139               | A                   | 0.49                      | 2.6×10 <sup>-18</sup> | <i>HLA-DPB2</i> | 0.44                      | 2.1×10 <sup>-28</sup> | <i>HLA-DPB2</i> |
| <i>rs3130201</i>        | 6          | 33097139               | A                   | -0.17                     | 5.2×10 <sup>-6</sup>  | <i>RPL32P1</i>  | -0.14                     | 1.2×10 <sup>-6</sup>  | <i>RPL32P1</i>  |
| <i>rs2894334</i>        | 6          | 33330567               | C                   | -0.13                     | 6.3×10 <sup>-7</sup>  | <i>DAXX</i>     | -0.14                     | 2.1×10 <sup>-11</sup> | <i>DAXX</i>     |

|                  |   |          |   |       |                       |               |       |                       |               |
|------------------|---|----------|---|-------|-----------------------|---------------|-------|-----------------------|---------------|
| <i>rs2894334</i> | 6 | 33330567 | C | 0.10  | $5.0 \times 10^{-6}$  | <i>ZBTB22</i> | 0.13  | $4.0 \times 10^{-9}$  | <i>ZBTB22</i> |
| <i>rs2894334</i> | 6 | 33330567 | C |       |                       |               | -0.17 | $2.8 \times 10^{-9}$  | <i>BAK1</i>   |
| <i>rs2894334</i> | 6 | 33330567 | C |       |                       |               | 0.06  | $1.3 \times 10^{-6}$  | <i>RPS18</i>  |
| <i>rs2894334</i> | 6 | 33330567 | C |       |                       |               | 0.1   | $2.9 \times 10^{-14}$ | <i>TAPBP</i>  |
| <i>rs5009448</i> | 6 | 29972711 | C | 0.5   | $6.7 \times 10^{-18}$ | HCP5B         | 0.45  | $6.8 \times 10^{-18}$ | HLA-H         |
| <i>rs5009448</i> | 6 | 29972711 | C | 0.44  | $1.1 \times 10^{-11}$ | MICD          | 0.46  | $2.2 \times 10^{-17}$ | HCP5B         |
| <i>rs5009448</i> | 6 | 29972711 | C | 0.42  | $1.5 \times 10^{-11}$ | HLA-H         | 0.33  | $1.1 \times 10^{-12}$ | HCG9          |
| <i>rs5009448</i> | 6 | 29972711 | C | -0.15 | $6.6 \times 10^{-8}$  | ZNRD1ASP      | 0.30  | $3.7 \times 10^{-9}$  | HLA-J         |
| <i>rs5009448</i> | 6 | 29972711 | C | -0.28 | $1.6 \times 10^{-6}$  | HCG4P7        | 0.28  | $8.2 \times 10^{-9}$  | MICD          |
| <i>rs5009448</i> | 6 | 29972711 | C | -0.29 | $1.2 \times 10^{-5}$  | HCG17         | 0.26  | $2.8 \times 10^{-7}$  | DDX39BP2      |
| <i>rs5009448</i> | 6 | 29972711 | C | 0.27  | $7.2 \times 10^{-5}$  | ZFP57         | 0.28  | $5.0 \times 10^{-7}$  | ZFP57         |
| <i>rs5009448</i> | 6 | 29972711 | C | 0.19  | $8.1 \times 10^{-5}$  | RPL23AP1      | 0.22  | $1.2 \times 10^{-6}$  | HCG4P3        |
| <i>rs5009448</i> | 6 | 29972711 | C | 0.16  | $3.1 \times 10^{-4}$  | HCG4P3        | 0.18  | $4.3 \times 10^{-6}$  | HLA-F-AS1     |
| <i>rs5009448</i> | 6 | 29972711 | C |       |                       |               | 0.24  | $5.9 \times 10^{-6}$  | HLA-K         |
| <i>rs5009448</i> | 6 | 29972711 | C |       |                       |               | -0.21 | $5.9 \times 10^{-6}$  | HCG4P7        |
| <i>rs5009448</i> | 6 | 29972711 | C |       |                       |               | 0.07  | $1.8 \times 10^{-5}$  | PPP1R11       |
| <i>rs5009448</i> | 6 | 29972711 | C |       |                       |               | 0.10  | $2.6 \times 10^{-5}$  | GABBR1        |
| <i>rs5009448</i> | 6 | 29972711 | C |       |                       |               | 0.19  | $1.8 \times 10^{-4}$  | RPL23AP1      |

|                  |   |          |   |       |                       |          |       |                        |           |
|------------------|---|----------|---|-------|-----------------------|----------|-------|------------------------|-----------|
| <i>rs4569</i>    | 6 | 31670030 | T | -0.53 | $1.8 \times 10^{-43}$ | LY6G5C   | -0.74 | $1.3 \times 10^{-119}$ | LY6G5C    |
| <i>rs4569</i>    | 6 | 31670030 | T | -0.22 | $1.2 \times 10^{-29}$ | LY6G5B   | -0.23 | $1.8 \times 10^{-33}$  | LY6G5B    |
| <i>rs4569</i>    | 6 | 31670030 | T | -0.28 | $1.5 \times 10^{-6}$  | HLA-DRB5 | -0.09 | $9.9 \times 10^{-9}$   | AIF1      |
| <i>rs4569</i>    | 6 | 31670030 | T | 0.29  | $3.9 \times 10^{-6}$  | STK19B   | -0.07 | $2.4 \times 10^{-7}$   | PRRC2A    |
| <i>rs4569</i>    | 6 | 31670030 | T | -0.11 | $9.0 \times 10^{-6}$  | DDAH2    | 0.26  | $3.5 \times 10^{-6}$   | STK19B    |
| <i>rs4569</i>    | 6 | 31670030 | T | -0.12 | $1.2 \times 10^{-4}$  | ABHD16A  | -0.18 | $2.6 \times 10^{-5}$   | LY6G6D    |
| <i>rs4569</i>    | 6 | 31670030 | T | -0.11 | $1.5 \times 10^{-4}$  | ATF6B    | 0.09  | $3.1 \times 10^{-5}$   | HCG27     |
| <i>rs4569</i>    | 6 | 31670030 | T | 0.14  | $2.5 \times 10^{-4}$  | HCG27    | -0.16 | $5.0 \times 10^{-5}$   | LINC00243 |
| <i>rs4569</i>    | 6 | 31670030 | T |       |                       |          | -0.16 | $5.1 \times 10^{-5}$   | HLA-DRB5  |
| <i>rs4569</i>    | 6 | 31670030 | T |       |                       |          | -0.17 | $2.3 \times 10^{-4}$   | VWA7      |
| <i>rs9268541</i> | 6 | 32416750 | C | 0.45  | $2.9 \times 10^{-5}$  | HLA-DRB9 | -0.27 | $3.4 \times 10^{-5}$   | HLA-DRB5  |

## White Participants

| SNP ID      | chr | Position (hg38) | Minor Allele | Lung Tissue (GTEx) |                      |          | Whole Blood (GTEx) |                      |          |
|-------------|-----|-----------------|--------------|--------------------|----------------------|----------|--------------------|----------------------|----------|
|             |     |                 |              | $\beta$ eta        | P-value              | Gene     | $\beta$ eta        | P-value              | Gene     |
| rs116062523 | 6   | 31383028        | C            |                    |                      |          | 0.69               | $2.5 \times 10^{-5}$ | MICB     |
| rs7754362   | 6   | 33143251        | C            | -0.11              | $4.2 \times 10^{-5}$ | RPS18    |                    |                      |          |
| rs1632859   | 6   | 31002121        | A            | -0.34              | $3.2 \times 10^{-7}$ | PSORS1C3 | 0.28               | $5.5 \times 10^{-7}$ | HLA-S    |
| rs1632859   | 6   | 31002121        | A            | 0.33               | $1.4 \times 10^{-6}$ | HLA-S    | 0.14               | $2.3 \times 10^{-6}$ | HLA-C    |
| rs1632859   | 6   | 31002121        | A            | -0.18              | $5.1 \times 10^{-5}$ | C4A      | 0.14               | $4.0 \times 10^{-6}$ | CCHCR1   |
| rs1632859   | 6   | 31002121        | A            | -0.23              | $6.5 \times 10^{-5}$ | POU5F1   | 0.21               | $4.6 \times 10^{-5}$ | HLA-J    |
| rs1632859   | 6   | 31002121        | A            | 0.14               | $1.0 \times 10^{-4}$ | CCHCR1   | -0.14              | $2.3 \times 10^{-4}$ | PSORS1C3 |
| rs1632859   | 6   | 31002121        | A            | 0.2                | $1.2 \times 10^{-4}$ | HLA-J    |                    |                      |          |
| rs1632859   | 6   | 31002121        | A            | 0.14               | $2.7 \times 10^{-4}$ | HCG27    |                    |                      |          |

|                    |   |          |   |       |                      |      |  |
|--------------------|---|----------|---|-------|----------------------|------|--|
| <i>rs115337486</i> | 6 | 33387741 | T | -0.34 | $1.0 \times 10^{-4}$ | DAXX |  |
|--------------------|---|----------|---|-------|----------------------|------|--|

### Black Participants

| <i>SNP ID</i>      | <i>chr</i> | <i>Position (hg38)</i> | <i>Minor Allele</i> | <i>Lung Tissue (GTEx)</i> |                       |             | <i>Whole Blood (GTEx)</i> |                       |             |
|--------------------|------------|------------------------|---------------------|---------------------------|-----------------------|-------------|---------------------------|-----------------------|-------------|
|                    |            |                        |                     | <i>beta</i>               | <i>P-value</i>        | <i>Gene</i> | <i>beta</i>               | <i>P-value</i>        | <i>Gene</i> |
| <i>rs117953947</i> | 6          | 30244862               | A                   | -0.41                     | $5.1 \times 10^{-5}$  | ZNRD1ASP    |                           |                       |             |
| <i>rs17200414</i>  | 6          | 31449359               | T                   | -0.43                     | $1.5 \times 10^{-8}$  | MICA        | -0.27                     | $3.4 \times 10^{-4}$  | MICA        |
| <i>rs200535118</i> | 6          | 31352792               | T                   | -0.55                     | $2.1 \times 10^{-4}$  | POU5F1      | 0.59                      | $6.0 \times 10^{-6}$  | MIR6891     |
| <i>rs62408569</i>  | 6          | 29406052               | T                   | 0.61                      | $8.8 \times 10^{-7}$  | MICE        | 0.56                      | $3.6 \times 10^{-4}$  | HLA-U       |
| <i>rs62408569</i>  | 6          | 29406052               | T                   | -0.49                     | $3.0 \times 10^{-6}$  | OR2H2       |                           |                       |             |
| <i>rs62408569</i>  | 6          | 29406052               | T                   | 0.71                      | $2.3 \times 10^{-5}$  | HLA-U       |                           |                       |             |
| <i>rs4713423</i>   | 6          | 31034524               | C                   | 0.69                      | $5.9 \times 10^{-24}$ | PSORS1C3    | 0.37                      | $4.9 \times 10^{-19}$ | PSORS1C3    |
| <i>rs4713423</i>   | 6          | 31034524               | C                   | 0.44                      | $4.6 \times 10^{-12}$ | HCG22       | -0.25                     | $5.6 \times 10^{-14}$ | HLA-C       |

|                   |   |          |   |       |                       |          |       |                      |          |
|-------------------|---|----------|---|-------|-----------------------|----------|-------|----------------------|----------|
| <i>rs4713423</i>  | 6 | 31034524 | C | -0.33 | $3.2 \times 10^{-11}$ | HLA-C    | 0.11  | $4.8 \times 10^{-7}$ | HCG27    |
| <i>rs4713423</i>  | 6 | 31034524 | C | 0.27  | $3.5 \times 10^{-11}$ | HCG27    | 0.26  | $1.3 \times 10^{-6}$ | CYP21A1P |
| <i>rs4713423</i>  | 6 | 31034524 | C | 0.28  | $3.8 \times 10^{-6}$  | POU5F1   | 0.16  | $6.5 \times 10^{-6}$ | POU5F1   |
| <i>rs4713423</i>  | 6 | 31034524 | C |       |                       |          | 0.11  | $1.5 \times 10^{-4}$ | HCG18    |
| <i>rs17198965</i> | 6 | 31308446 | G | -0.5  | $7.5 \times 10^{-5}$  | POU5F1   |       |                      |          |
| <i>rs73403122</i> | 6 | 32501344 | G | 0.51  | $8.4 \times 10^{-5}$  | HLA-DOA  |       |                      |          |
| <i>rs73403122</i> | 6 | 32501344 | G | 0.81  | $9.7 \times 10^{-5}$  | HLA-DRB9 |       |                      |          |
| <i>rs17422797</i> | 6 | 32297751 | T | -0.46 | $2.8 \times 10^{-5}$  | HLA-DQB2 | -0.36 | $5.2 \times 10^{-5}$ | HLA-DQB2 |
| <i>rs17422797</i> | 6 | 32297751 | T | 0.44  | $3.6 \times 10^{-5}$  | HCG23    |       |                      |          |
| <i>rs17422797</i> | 6 | 32297751 | T | 0.23  | $9.0 \times 10^{-5}$  | TAP2     |       |                      |          |
| <i>rs17422797</i> | 6 | 32297751 | T | 0.46  | $1.6 \times 10^{-4}$  | STK19B   |       |                      |          |



**Supplementary Table S5.** Functional annotation of variants in the MHC region identified from fine-mapping analyses (chr6: 28,510,120-33,480,577). We gathered information on each variant's potential genomic regulatory role from publicly available data, including quantitative measures of functional importance (CADD score and RegDB rank and score), indication of functional genomic elements (ENCODE), and long-range chromatic interactions (Hi-C data from HUGIn) for all, White, and Black participants.

| <i>All Participants</i>       |               |      |                    |       |                 |                      |             |             |
|-------------------------------|---------------|------|--------------------|-------|-----------------|----------------------|-------------|-------------|
| Variants                      | chr:BP (hg38) | CADD | RegDB <sup>†</sup> |       | ENCODE          |                      | Hi-C        |             |
|                               |               |      | Rank               | Score | Target of Assay | Bio-sample           | IMR90       | MES         |
| <i>rs9265901</i> <sup>†</sup> | 6:31345615    | 7.50 | 4                  | 0.61  |                 |                      | HCG27       | HCG27       |
| <i>rs59377618</i>             | 6:32820360    | 6.50 | 5                  | 0.13  |                 |                      | BTNL2       | HLA-DMA     |
| <i>rs3130201</i>              | 6:33097139    | 1.72 | 5                  | 0.29  |                 |                      | HLA-DPB2    | HLA-DPB2    |
| <i>rs2894334</i>              | 6:33330567    | 1.24 | 5                  | 0.34  |                 |                      | KIFC1       | HLA-DPB2    |
| <i>rs5009448</i>              | 6:29972711    | 5.41 | 4                  | 0.61  |                 |                      | HLA-G, HCG4 | HLA-G, HCG4 |
| <i>rs7767589</i>              | 6:30402196    | 2.72 | 5                  | 0.13  |                 |                      | TIM26       | TRIM26      |
| <i>rs73728546</i>             | 6:31380112    | 0.11 | 5                  | 0.13  | DNase           | Lung, CD8+ cell line |             |             |
| <i>rs4569</i>                 | 6:31670030    | 21.5 | 1f                 | 0.55  |                 |                      | MSH5; CLIC1 | NEU1        |
| <i>rs566687684</i>            | 6:33061419    | 0.76 | 7                  | 0.18  |                 |                      | HLA-DPB2    | HLA-DPB2    |
| <i>rs9268541</i>              | 6:32416750    | 0.12 | 5                  | 0.59  |                 |                      | HLA-DOB     | HLA-DQB2    |

|                                |            |       |    |      |                            |                                                                |                  |                  |
|--------------------------------|------------|-------|----|------|----------------------------|----------------------------------------------------------------|------------------|------------------|
| <i>rs62407970</i>              | 6:32969217 | 15.8  | 2b | 0.82 | DNase, H3K4me3,<br>H3K27ac | Lung, CD14+, CD8+, CD4+,<br>naïve B, natural killer cell lines | HLA-DPB2         | HLA-DPB2         |
| <b>White Participants</b>      |            |       |    |      |                            |                                                                |                  |                  |
| <i>rs55888430<sup>†</sup></i>  | 6:32817365 | 1.07  | 4  | 0.61 |                            |                                                                | BTNL2            | BTNL2            |
| <i>rs5009448</i>               | 6:29972711 | 5.41  | 4  | 0.61 |                            |                                                                | HLA-G, HCG4      | HLA-G, HCG4      |
| <i>rs116062523</i>             | 6:31383028 | 11.7  | 4  | 0.61 |                            |                                                                |                  |                  |
| <i>rs7754362</i>               | 6:33143251 | 6.14  | 4  | 0.61 | DNase, CTCF                | Lung, CD14+, CD4+, CD8+,<br>IMR90 cell lines                   | HLA-DMA,<br>BRD2 | HLA-DMA,<br>BRD2 |
| <i>rs1205233282</i>            | 6:29800571 | .     | 5  | 0.13 |                            |                                                                |                  |                  |
| <i>rs41316358</i>              | 6:29816791 | .     | 5  |      |                            |                                                                | HLA-J            | HLA-J            |
| <i>rs529698255</i>             | 6:31932537 | 2.54  | 7  | 0.18 |                            |                                                                | MSH5             | HLA-DOB          |
| <i>rs1632859</i>               | 6:31002121 | 2.13  | 4  | 0.61 |                            |                                                                | HCG22            | HCG22            |
| <i>rs17208209</i>              | 6:32227599 | 1.81  | 4  | 0.61 |                            |                                                                | HLA-DOB          | HLA-DOB          |
| <i>rs115337486</i>             | 6:33387741 | 0.012 | 7  | 0.18 |                            |                                                                | DAXX             |                  |
| <b>Black Participants</b>      |            |       |    |      |                            |                                                                |                  |                  |
| <i>rs117953947<sup>§</sup></i> | 6:30244862 | 0.69  | 3a | 0.61 |                            |                                                                | RPP21            | RPP21            |

|                    |            |      |    |      |                |                                                                          |          |                    |
|--------------------|------------|------|----|------|----------------|--------------------------------------------------------------------------|----------|--------------------|
| <i>rs150891754</i> | 6:28608725 | 1.74 | 4  | 0.61 |                |                                                                          |          | GPX5, GPX6         |
| <i>rs17200414</i>  | 6:31449359 | 3.11 | 5  | 0.13 |                |                                                                          | HLA-C    |                    |
| <i>rs200535118</i> | 6:31352792 | 0.18 | 3a | 0.61 |                |                                                                          |          |                    |
| <i>rs62408569</i>  | 6:29406052 | 8.47 | 5  | 0.13 |                |                                                                          | ZNF311   | LINC01015          |
| <i>rs181714996</i> | 6:33331782 | 1.07 | 5  | 1.0  |                |                                                                          | KIFC1    |                    |
| <i>rs115571466</i> | 6:32998090 | 7.91 | 5  | 0.13 |                |                                                                          | HLA-DPB2 | HLA-DPB2           |
| <i>rs4713423</i>   | 6:31034524 | 2.04 | 5  | 0.33 |                |                                                                          | MUC22    | MUC22              |
| <i>rs17198965</i>  | 6:31308446 | 9.43 | 4  | 0.61 | DNase, H3K4me3 | Lung, CD14+, CD4+, CD8+, B, bronchial epithelial, T helper 17 cell lines |          |                    |
| <i>rs73403122</i>  | 6:32501344 | 9.21 | 3a | 0.96 |                |                                                                          |          | HLA-DRB1, HLA-DRB6 |
| <i>rs17422797</i>  | 6:32297751 | 6.24 | 5  | 0.54 |                |                                                                          | HLA-DOB  | HLA-DOB            |
| <i>rs79735834</i>  | 6:29517075 | 2.77 | 4  | 0.61 |                |                                                                          | MAS1L    | MAS1L              |
| <i>rs187569734</i> | 6:31044172 | 0.83 | 3a | 0.57 |                |                                                                          | MUC22    | MUC22              |

¶The RegulomeDB (RegDB) score represents the likelihood that a variant is located in a functional region. The RegDB variant classification scheme is defined in Boyle et al. (2012).

*Likely to affect binding*

2b: TF binding + matched TF motif + matched DNase footprint + DNase peak

*Minimal binding evidence*

4: TF binding + DNase peak

5: TF binding or DNase peak

6: Motif hit

### 3 References

- Akhtari, F.S., Lloyd, D., Burkholder, A., Tong, X., House, J.S., Lee, E.Y., et al. (2023). Questionnaire-Based Polyexposure Assessment Outperforms Polygenic Scores for Classification of Type 2 Diabetes in a Multiancestry Cohort. *Diabetes Care* 46(1-9). doi: 10.2337/dc22-0295.
- Boyle, A.P., Hong, E.L., Hariharan, M., Cheng, Y., Schaub, M.A., Kasowski, M., et al. (2012). Annotation of functional variation in personal genomes using RegulomeDB. *Genome Res* 22(9), 1790-1797.
- Byrska-Bishop, M., Evani, U.S., Zhao, X., Basile, A.O., Abel, H.J., Regier, A.A., et al. (2022). High-coverage whole-genome sequencing of the expanded 1000 Genomes Project cohort including 602 trios. *Cell* 185(18), 3426-3440.e3419. doi: 10.1016/j.cell.2022.08.004.
- ENCODE Project Consortium (2012). An integrated encyclopedia of DNA elements in the human genome. *Nature* 489(7414), 57-74. doi: 10.1038/nature11247.
- Fairley, S., Lowy-Gallego, E., Perry, E., and Flicek, P. (2020). The International Genome Sample Resource (IGSR) collection of open human genomic variation resources. *Nucleic Acids Res* 48(D1), D941-d947. doi: 10.1093/nar/gkz836.
- Genotype-Tissue Expression (GTEx) Project (2022). GTEx Portal.
- Ghoussaini, M., Mountjoy, E., Carmona, M., Peat, G., Schmidt, E.M., Hercules, A., et al. (2021). Open Targets Genetics: systematic identification of trait-associated genes using large-scale genetics and functional genomics. *Nucleic Acids Res* 49(D1), D1311-d1320. doi: 10.1093/nar/gkaa840.
- Lee, E.Y., Mak, A.C.Y., Hu, D., Sajuthi, S., White, M.J., Keys, K.L., et al. (2020). Whole-genome sequencing identifies novel functional loci associated with lung function in Puerto Rican youth. *Am J Respir Crit Care Med* 202(7), 962-972. doi: 10.1164/rccm.202002-0351OC.

- Lee, H., and Kingsford, C. (2018). Kourami: graph-guided assembly for novel human leukocyte antigen allele discovery. *Genome Biol* 19(1), 16. doi: 10.1186/s13059-018-1388-2.
- Li, H., and Durbin, R. (2010). Fast and accurate long-read alignment with Burrows-Wheeler transform. *Bioinformatics* 26(5), 589-595. doi: 10.1093/bioinformatics/btp698.
- Luo, Y., Hitz, B.C., Gabdank, I., Hilton, J.A., Kagda, M.S., Lam, B., et al. (2020). New developments on the Encyclopedia of DNA Elements (ENCODE) data portal. *Nucleic Acids Res* 48(D1), D882-d889. doi: 10.1093/nar/gkz1062.
- Maples, B.K., Gravel, S., Kenny, E.E., and Bustamante, C.D. (2013). RFMix: a discriminative modeling approach for rapid and robust local-ancestry inference. *Am J Hum Genet* 93(2), 278-288. doi: 10.1016/j.ajhg.2013.06.020.
- Martin, J.S., Xu, Z., Reiner, A.P., Mohlke, K.L., Sullivan, P., Ren, B., et al. (2017). HUGIn: Hi-C Unifying Genomic Interrogator. *Bioinformatics* 33(23), 3793-3795. doi: 10.1093/bioinformatics/btx359.
- Mountjoy, E., Schmidt, E.M., Carmona, M., Schwartzentruber, J., Peat, G., Miranda, A., et al. (2021). An open approach to systematically prioritize causal variants and genes at all published human GWAS trait-associated loci. *Nat Genet* 53(11), 1527-1533. doi: 10.1038/s41588-021-00945-5.
- Purcell, S., Neale, B., Todd-Brown, K., Thomas, L., Ferreira, M.A., Bender, D., et al. (2007). PLINK: a tool set for whole-genome association and population-based linkage analyses. *Am J Hum Genet* 81(3), 559-575. doi: 10.1086/519795.
- Robinson, J., Barker, D.J., Georgiou, X., Cooper, M.A., Flicek, P., and Marsh, S.G.E. (2020). IPD-IMGT/HLA Database. *Nucleic Acids Res* 48(D1), D948-d955. doi: 10.1093/nar/gkz950.
